1 Complex basis of hybrid female sterility and Haldane’s rule  
2 in *Heliconius* butterflies: Z-linkage and epistasis

3 Neil Rosser<sup>1,2\*</sup>, Nathaniel B. Edelman<sup>1\*</sup>, Lucie M. Queste<sup>2</sup>, Michaela Nelson<sup>2</sup>,  
4 Fernando Seixas<sup>1</sup>, Kanchon K. Dasmahapatra<sup>2</sup> and James Mallet<sup>1</sup>

5 <sup>1</sup>Department of Organismic and Evolutionary Biology, Harvard University, Mass., USA

6 <sup>2</sup>Department of Biology, University of York, York, UK

\*Authors for correspondence: [neil.rosser@york.ac.uk](mailto:neil.rosser@york.ac.uk) & [edelmannate@gmail.com](mailto:edelmannate@gmail.com)

7 **Abstract**

8 Hybrids between diverging populations are often sterile or inviable. Hybrid unfit-  
9 ness usually evolves first in the heterogametic sex – a pattern known as Haldane’s rule. The ge-  
10 netics of Haldane’s Rule have been extensively studied in species where the male is the het-  
11 erogametic (XX/XY) sex, but its basis in taxa where the female is heterogametic (ZW/ZZ),  
12 such as Lepidoptera and birds, is largely unknown. Here, we analyse a new case of female  
13 hybrid sterility between geographic subspecies of *Heliconius pardalinus*. The two subspecies  
14 mate freely in captivity, but female F1 hybrids in both directions of cross are sterile. Steril-  
15 ity is due to arrested development of oocytes after they become differentiated from nurse  
16 cells, but before yolk deposition. We backcrossed fertile male F1 hybrids to parental fe-  
17 males, and mapped quantitative trait loci (QTLs) for female sterility. We also identified  
18 genes differentially expressed in the ovary, and as a function of oocyte development. The Z  
19 chromosome has a major effect, similar to the “large X effect” in *Drosophila*, with strong

20 epistatic interactions between loci at either end of the Z chromosome, and between the Z  
21 chromosome and autosomal loci on chromosomes 8 and 20. Among loci differentially ex-  
22 pressed between females with arrested vs. non-arrested ovary development, we identified  
23 six candidate genes known also from *Drosophila melanogaster* and *Parage aegeria* oogen-  
24 esis. This study is the first to characterize hybrid sterility using genome mapping in the  
25 Lepidoptera. We demonstrate that sterility is produced by multiple complex epistatic in-  
26 teractions often involving the sex chromosome, as predicted by the dominance theory of  
27 Haldane's Rule.

28 **Keywords**— Speciation, Haldane's Rule, hybrid sterility, ZW sex determination, Dobzhansky-  
29 Muller incompatibilities, Lepidoptera

# 1 Introduction

Hybrids between diverging populations are often sterile or inviable (Darwin, 1859; Presgraves, 2010). Because such examples of postzygotic incompatibility are common between species, elucidating their genetic basis is seen as key to understanding speciation (Nosil & Schluter, 2011; Butlin *et al.*, 2012; Castillo & Barbash, 2017; Coughlan & Matute, 2020). Hybrid dysfunction often results from epistatic interactions among genes known as “Dobzhansky-Muller Incompatibilities” (Bateson, 1909; Dobzhansky, 1936; Muller, 1942; Coyne & Orr, 2004). Under the Dobzhansky-Muller model, diverging populations acquire different alleles at two or more loci. In hybrids, previously untested combinations of alleles at different loci are brought together and interact to reduce fitness (Orr, 1995; Brideau *et al.*, 2006; Tang & Presgraves, 2009; Presgraves, 2007; Maheshwari & Barbash, 2011).

Dobzhansky-Muller incompatibilities (DMIs) may involve only a pair of genes (Sweigart *et al.*, 2006), but they are perhaps more likely to be complex, even early in speciation (e.g. Phadnis, 2011; Kalirad & Azevedo, 2017). This is because the expected number of two-locus DMIs is predicted to increase approximately as the square of the number of divergent substitutions between species; the “snowball effect” (Orr, 1995; Orr & Turelli, 2001; Matute *et al.*, 2010). Furthermore, DMIs involving more than two loci should accumulate even more rapidly, because, as the number of interacting loci increases, so too does the number of potentially negative combinations (Orr, 1995). In keeping with these predictions, widespread DMIs across the genomes of a number of species have been inferred from genetic association data (Good *et al.*, 2008; Schumer *et al.*, 2014). There is also evidence that polymorphic alleles with negative epistatic interactions are common even within species (Corbett-Detig *et al.*, 2013)

One of the few generalisations about speciation is Haldane’s Rule, which states that among hybrids, when one sex is absent, rare, or sterile, it is usually the heterogametic sex (males

55 in XX/XY systems and females in ZZ/ZW systems (Haldane, 1922). Greater sterility of the  
56 heterogametic sex has been found in 213 out of 223 pairs (>95%) of a diverse array of taxa,  
57 and has at least 10 phylogenetically independent origins (Schilthuizen *et al.*, 2011; Delph  
58 & Demuth, 2016). The ubiquity of Haldane’s rule therefore suggests that postzygotic in-  
59 compatibilities evolve with some predictability across a wide range of taxa (Coyne, 1992).  
60 Hybrid sterility of the heterogametic sex also evolves early, typically before hybrid invia-  
61 bility (Coyne & Orr, 1989a; 1997; Presgraves, 2010; 2002). It may therefore have a dispro-  
62 portionate role in reducing gene flow, and as such is of particular interest for understanding  
63 speciation (Ramsey *et al.*, 2003; Coughlan & Matute, 2020).

64 Most explanations for Haldane’s rule depend on DMIs. The hypothesis to have received the  
65 most support is dominance theory, in which hybrid sterility and inviability are produced  
66 by interactions between the sex chromosomes and autosomes (Coyne & Orr, 2004). In the  
67 homogametic sex of hybrids, sex-linked alleles produce incompatibilities only if dominant,  
68 whereas in heterogametic hybrids both dominant and recessive sex-linked alleles can cause  
69 incompatibilities. If alleles causing incompatibilities are on average recessive, the heteroga-  
70 metic sex is expected to suffer more than the homogametic sex (Turelli & Orr, 1995; Orr,  
71 1997; Turelli & Moyle, 2007). Nonetheless, male heterogametic species without strongly  
72 differentiated sex chromosomes also conform to Haldane’s Rule (Presgraves & Orr, 1998),  
73 suggesting that other forces also contribute, such as “faster-male” evolution (Wu & Davis,  
74 1993) and faster evolution of the sex chromosome (Sackton *et al.*, 2014). The genetic and  
75 molecular mechanisms of hybrid sterility have been identified in some cases (Brideau *et al.*,  
76 2006; Tang & Presgraves, 2009; Schartl, 2008; Mihola *et al.*, 2009; Bayes & Malik, 2009),  
77 but this work has been primarily carried out in organisms with XX/XY sex determination,  
78 in which male hybrids are sterile or inviable.

79 Lepidoptera (butterflies and moths) yielded the first example of a sex linked trait (Don-  
80 caster & Raynor, 1906), even before *Drosophila* (Morgan, 1910; 1911). Lepidoptera are also  
81 among the groups of taxa Haldane considered when formulating his eponymous rule (Hal-

82 [dane, 1922](#)). They have ZW/ZZ sex determination, where females are the heterogametic  
83 sex and, in accordance with Haldane's Rule, are more susceptible to hybrid dysfunction  
84 ([Presgraves, 2002](#)). As such, they are critical in evaluating the relative impact of domi-  
85 nance and faster male evolution in Haldane's rule, and have provided evidence that faster-  
86 Z evolution may contribute to the phenomenon in female heterogametic systems ([Prow-  
87 ell Pashley, 1998](#); [Sackton et al., 2014](#)).

88 Several examples of Haldane's Rule have been reported in *Heliconius* butterflies (Nymphal-  
89 idae), which comprise about 48 species that occur throughout much of tropical America  
90 ([Jiggins, 2017](#)). Female hybrid sterility has been observed in crosses between *Heliconius*  
91 *cydno* (*sensu lato*) and *Heliconius melpomene* ([Naisbit et al., 2002](#); [Salazar et al., 2005](#);  
92 [Sánchez et al., 2015](#)), and also between geographically distant subspecies of *Heliconius*  
93 *melpomene* ([Jiggins et al., 2001](#)). Here, we investigate the genetic and molecular basis of  
94 Haldane's rule in hybrids between two subspecies of *Heliconius pardalinus*: *H. pardali-  
95 nus butleri* and *H. pardalinus sergestus*. These largely allopatric subspecies are strongly  
96 genetically differentiated, with *H. p. butleri* more closely related over most of its genome  
97 to its sympatric relative *Heliconius elevatus*, thereby rendering *H. pardalinus* paraphyletic  
98 ([Rosser et al., 2019](#)). They inhabit different habitats, with *H. p. sergestus* restricted to dry  
99 forests in the Huallaga/Mayo valleys of the Andes, and *H. p. butleri* inhabiting lowland  
100 rainforest across the adjacent Amazon basin (Fig. 1). Although they mate freely in cap-  
101 tivity, they rarely co-occur in nature, and F1 hybrid females in both directions of cross  
102 are completely sterile ([Rosser et al., 2019](#)). Here, we characterize the ovary phenotype in  
103 parental populations, F1 hybrids and backcrosses. We use backcrosses to *H. p. butleri* to  
104 generate a QTL map and intersect these data with genes differentially expressed between  
105 fertile and sterile individuals, to identify candidate genes and epistatic interactions respon-  
106 sible for hybrid sterility.

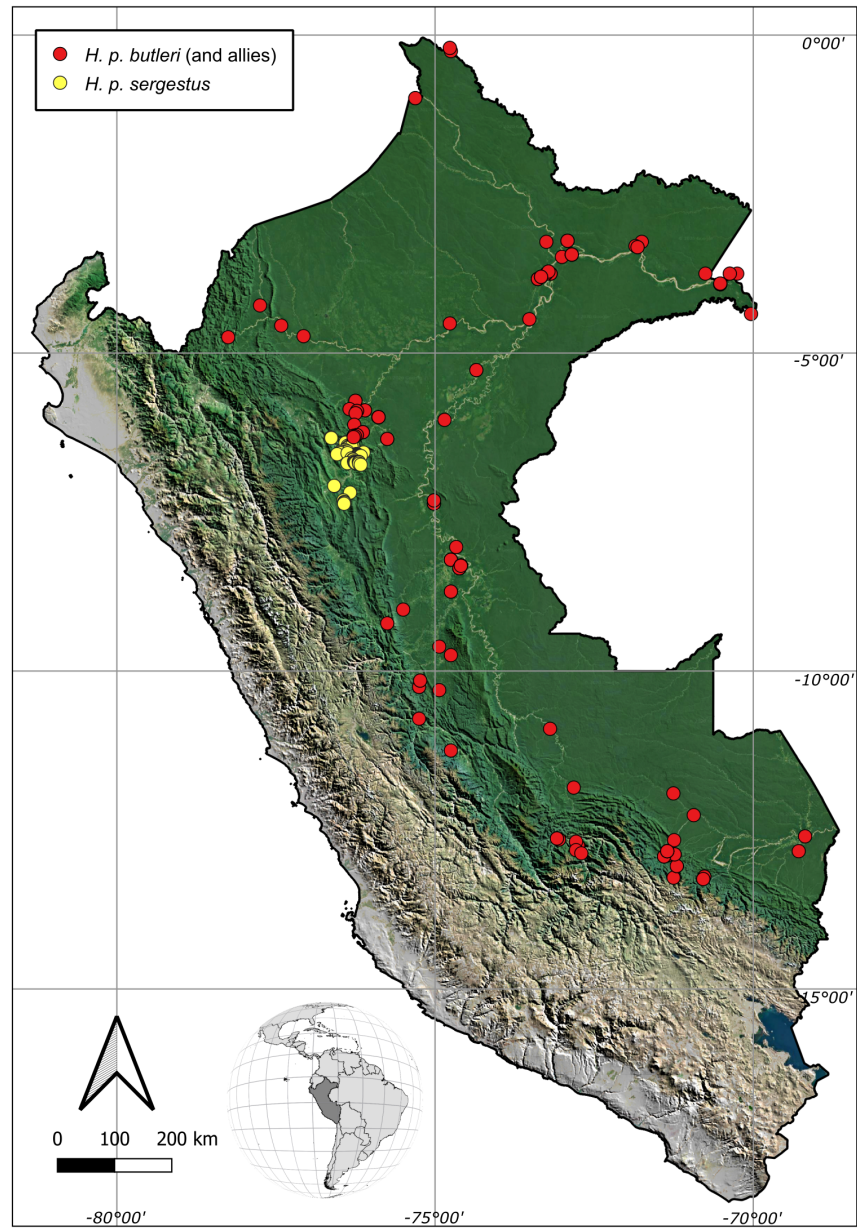

Figure 1: Distribution of *H. pardalinus* in Peru. The yellow dots correspond to collection localities of *H. pardalinus sergestus* and the red dots to *H. pardalinus butleri*, which intergrades with other subspecies of in central and southern Peru and the Amazon basin. Geographic data are from [Rosser \*et al.\* \(2019; 2012\)](#).

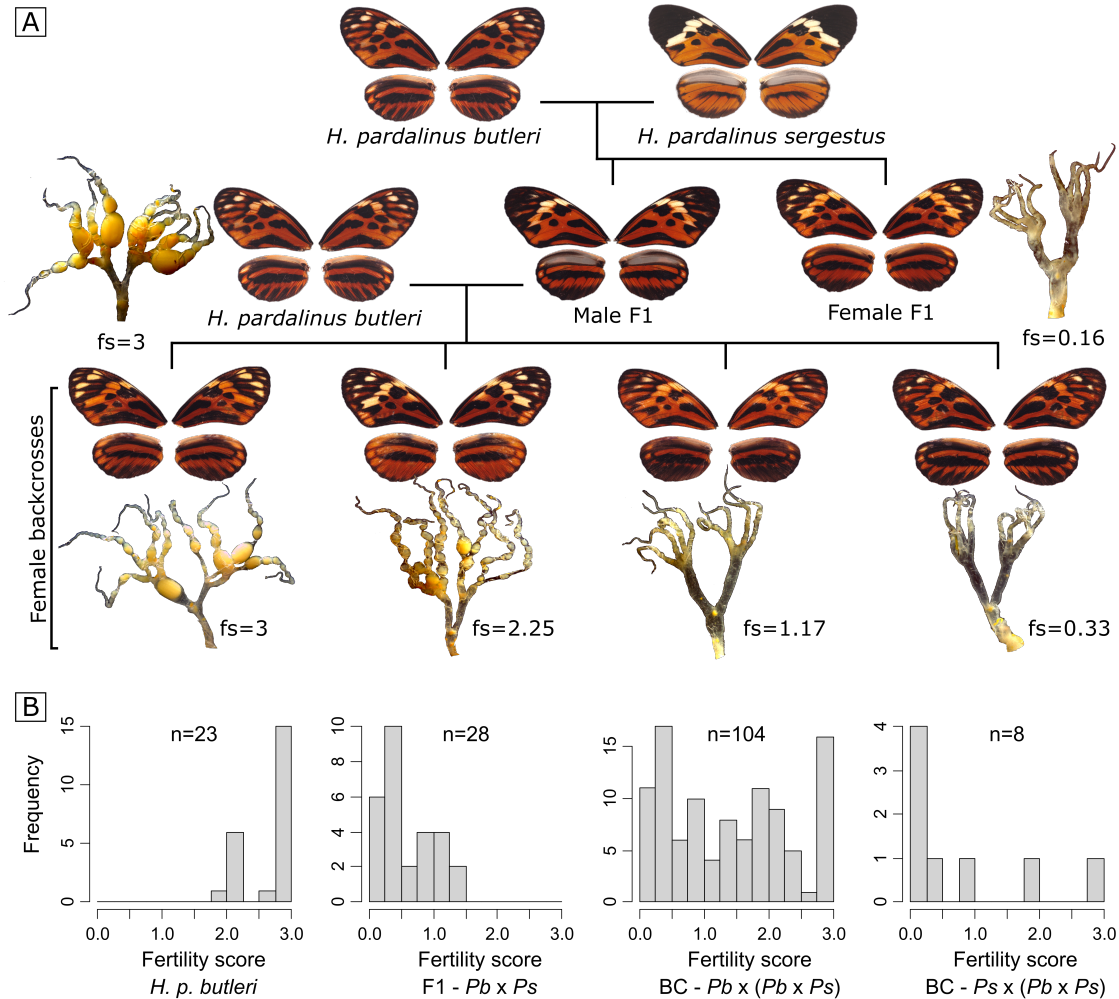

**Figure 2: Crossing scheme and distribution of phenotypes.** **A** Crossing *H. p. butleri* with *H. p. sergestus* in either direction produces sterile female F1s, while male F1s are fertile. Backcrossing these males in either direction produces females with variable fertility. Example wing phenotypes and dissected ovaries for backcrosses to *H. p. butleri* are shown, with fertile individuals to the left and sterile individuals to the right; fs = fertility score assigned to the dissected ovary. **B** Histograms of ovary fertility scores for i) *H. p. butleri* females, ii) F1s produced by mating a female *H. p. butleri* (*Pb*) with a male *H. p. sergestus* (*Ps*), iii) backcrosses produced by mating fertile male F1 (*Pb* × *Ps*) with female *H. p. butleri* (*Pb*), and backcrosses produced by mating fertile male F1 (*Pb* × *Ps*) with female *H. p. sergestus* (*Ps*).

## 2 Materials and methods

### 2.1 Butterfly rearing, nucleic acid preservation and ovary dissection

Butterfly stocks were collected in the Departments of San Martín, Loreto and Ucayali, Peru, and captive populations of *H. p. sergestus* and *H. p. butleri* were established in insectaries in Tarapoto, Peru, as previously described (Rosser *et al.*, 2019). Female butterflies were collected from insectaries 15 days after eclosion, allowing time for eggs to develop fully (Dunlap-Pianka *et al.*, 1977; Naisbit *et al.*, 2002). Wings were removed and stored in glassine envelopes as vouchers. Thorax and head were removed and stored in NaCl-saturated dimethyl sulfoxide at  $-20^{\circ}\text{C}$  for DNA extraction and processing. Approximately half of the ovaries were dissected immediately, and for the remainder, abdomens were stored in 96% ethanol and transported to the laboratory for fine dissection. In all cases, ovaries were dissected from the abdomen in ice-cold phosphate buffered saline (PBS) using fine forceps and insect pins. Tracheae and fat bodies were removed manually, and images were taken at 8X, 12.5X, and 20X magnification for phenotyping. Of the ovaries dissected in the field, six backcrosses and two pure *H. pardalinus butleri* were stored in RNALater solution for RNAseq (ThermoFisher AM7020).

### 2.2 Ovary staining and phenotyping

For every dissection, we scored the developmental progress of ovaries on a scale of 0 (empty ovaries) to 3 (containing fully-developed yolky eggs) based on gross morphology (fertility score, Fig. S1, and see examples in Fig. 2). Three images from each ovary were scored blind by two independent scorers. The resulting six scores per ovary were averaged to yield a



129 single fertility score for each individual.

130 In a subset of samples, we characterized the earliest arrested developmental stages of oocytes  
131 through nuclear staining with DAPI, using the stages described in the silkworm (*Bombyx*  
132 *mori*) as a reference (Fig. 3). Individual ovarioles from alcohol-stored ovaries were removed  
133 and rehydrated by 15 minute incubations in serial dilutions of ethanol in 0.1% tween 20  
134 in 1X phosphate-buffered saline (PBT) (Ethanol concentrations: 95%, 90%, 80%, 60%,  
135 40%, 20%, 0%). Once fully re-hydrated, ovaries were incubated in acridine orange solution  
136 (ThermoFisher A1301; 5 µg/mL in PBT) to visualize cytoplasm. They were then washed  
137 in PBT before being stained with DAPI (1 µL/mL in PBT), washed once more in PBT,  
138 and mounted on slides with VectaShield (Vector Labs). Slides with stained ovarioles were  
139 scanned with a Zeiss Axio Scan Z1, and high-magnification images were taken with a Zeiss  
140 LSM 880 upright confocal microscope. The most highly developed follicle in each ovariole  
141 was staged through visual comparison to oocyte development stages described in *Bombyx*  
142 *mori* (Yamauchi & Yoshitake, 1984).

### 143 **2.3 DNA extraction and sequencing**

144 RNA-free genomic DNA was extracted from individuals used in QTL mapping (see below)  
145 using a Qiagen DNeasy Blood and Tissue Kit and following the manufacturer's standard  
146 protocol. Restriction site Associated DNA (RADSeq) libraries were prepared using a pro-  
147 tocol modified from Etter et al. (Etter *et al.*, 2011; Hoffman *et al.*, 2014), using a *PstI* re-  
148 striction enzyme, sixteen 6bp P1 barcodes and eight indexes. DNA was Covaris sheared  
149 and gel size selected to 300-700bp. 128 individuals were sequenced per lane, with 125bp  
150 paired-end reads, on an Illumina HiSeq 2500.

## 2.4 SNP calling

FastQ files from each RAD library were demultiplexed using `process_radtags` from Stacks (Catchen *et al.*, 2013), and BWA-MEM (Li, 2013) was used with default parameters to map the reads both to the *H. melpomene* genome (Hmel2.5) (Davey *et al.*, 2017) and to the *H. pardalinus* genome (Hpar) (Seixas *et al.*, 2021). BAM files were then sorted and indexed with SAMtools (Li *et al.*, 2009), and Picard-tools v 1.119 (<https://github.com/broadinstitute/picard>) was used to add read groups and mark PCR duplicates. To check for incorrectly labelled samples, we estimated the sex of a sample by dividing the mean number of reads per kilobase on the Z chromosome by the mean value for autosomes. This returned a value close to 1 in males and 0.7 in females, which can then be compared with the recorded sex of the sample. To further check for labelling errors, confirm pedigrees, and assign samples with unrecorded pedigree to families, we used Plink 1.9 (Chang *et al.*, 2015) to estimate the fraction of the genome that is identical by descent (IBD;  $\hat{\pi}$ ) between all pairwise combinations of samples (siblings and parent-offspring comparisons should yield  $\hat{\pi}$  values close to 0.5). In addition, for specimens that were sequenced multiple times in order to improve coverage, we checked that samples were derived from the same individual (with  $\hat{\pi}$  values close to one). We then merged these samples, using the `MergeSamFiles` command from Picard-tools, and used Samtools' `mpileup` command to call single nucleotide polymorphisms (SNPs) for linkage map construction.

## 2.5 Linkage map construction

Linkage maps were built using reads aligned to each of the reference genomes using Lep-MAP3 (Rastas, 2017). The ParentCall2 module was used to correct erroneous or missing parental genotypes, and call sex-linked markers using a log-odds difference of  $>2$ . We used Filtering2 to remove SNPs showing segregation distortion, specifying a  $P$ -value limit of 0.01

175 (i.e., there is a 1:100 chance that a randomly segregating marker is discarded). Because we  
176 genotyped only female offspring, we did not filter sex-linked markers for segregation distur-  
177 tion. We then used SeparateChromosomes2 to cluster markers to linkage groups, specifying  
178 zero recombination in females and joining pairs of markers with LOD-score greater than  
179 14. To obtain recombination distances between markers, we fixed the order of the markers  
180 to their order on the Hmel2.5 or Hpar genome assemblies, and then evaluated this order,  
181 again using paternally and dual informative markers. Lep-MAP3 outputs fully informative  
182 and phased genotypes with no missing data, which can be used for QTL mapping.

## 183 2.6 QTL mapping

184 Genetic data were analysed as backcrosses (Fig. 2) using the paternally inherited allele. We  
185 used R/QTL (Broman *et al.*, 2003) to estimate genotype probabilities at 1 cM intervals,  
186 using the Haldane mapping function and an assumed genotyping error rate of 0.001. Loci  
187 with inferred genotypes were labelled using the chromosome and the centimorgan position.  
188 We used Haley-Knott (H-K) regression to test for associations between the estimated geno-  
189 type probabilities at each marker and fertility score (Haley & Knott, 1992). BB genotypes  
190 were coded as 0.5 and BS genotypes were coded as -0.5, where B is the *H. p. butleri* allele  
191 and S is the *H. p. sergestus* allele.

192 We first built a single locus additive QTL model at each position in the genome ( $H_1; y =$   
193  $\mu_1 + \beta_1 q_1 + \varepsilon$ ) and calculated the  $\log_{10}$  likelihood ratio (LOD score) comparing ( $H_1$ ) with  
194 the null hypothesis of no QTL ( $H_0; y = \mu_1 + \varepsilon$ ). To identify loci that act in combination  
195 to produce the phenotype, we then estimated LOD scores using all pairwise combinations  
196 of typed markers and inferred genotypes at 1 cM intervals across the genome, while allow-  
197 ing interactions between them ( $H_f; y = \mu_1 + \beta_1 q_1 + \beta_2 q_2 + \beta_3 q_1 q_2 + \varepsilon$ ). The difference  
198 between LOD values for ( $H_f$ ) and the corresponding two locus additive model ( $H_a; y =$   
199  $\mu_1 + \beta_1 q_1 + \beta_2 q_2 + \varepsilon$ ) gives the improvement in fit attributable purely to interactive ef-

fects ( $H_{int}$ ). The difference between  $LOD_f$  and the maximum LOD value obtained from single QTL locus models at either marker indicates the presence of a second QTL, allowing for epistasis ( $H_{fv1}$ ). We also performed these analyses while controlling for kinship. To do this, we used LepMap to estimate  $\hat{\pi}$  (IBD) between all individuals. We then created a variance-covariance matrix of genetic relatedness, and included this in our models as a random effect. Significance of QTL scans was assessed by permuting the phenotypes relative to the genotypes (10,000 permutations). Because we analysed only female backcrosses, the degrees of freedom for QTL models at sex-linked and autosomal loci are the same, and so we set a single genome-wide significance threshold for each scan.

## 2.7 Population genomics

To examine genomic differentiation between the *H. p. sergestus*, *H. p. butleri* and *H. elevatus*, previously published whole genome re-sequencing data (four individuals each taxon) were used (NCBI accession numbers: ERS070236; ERS977673; ERS977674; ERS070238; ERS4368504; SRS329822; SRS329823; SRS329824; SRS329825; SRS329826; SRS3298233; SRS1247739; ERS235668; ERS977715; ERS977716; ERS977717). Raw reads were filtered for Illumina adapters using cutadapt (Martin, 2011) and mapped to the Hmel2.5 (Davey *et al.*, 2017) (Seixas *et al.*, 2021) genomes using BWA MEM v0.7.15. Duplicate reads were removed using sambamba v0.6.8 (Tarasov *et al.*, 2015) and the Genome Analysis Toolkit (GATK) v3.8 RealignerTargetCreator and IndelRealigner modules (DePristo *et al.*, 2011; McKenna *et al.*, 2010) were used to realign reads around indels. Genotype calling was performed for each taxon separately with bcftools (Li *et al.*, 2009) mpileup and call modules (Li, 2011), using the multiallelic and rare-variant calling option (-m) and requiring a minimum mapping quality and base quality of 20. Genotype calls were required to have a minimum quality score (QUAL) of 20, RMSMappingQuality (MQ)  $\geq 20$ , genotype quality (GQ)  $\geq 20$  and a minimum individual depth of coverage (DP)  $\geq 8$  (or DP  $\geq 4$  for the Z chromo-

225 some of females). Genotypes within 5 bp of an indel were recorded as missing data.

226 Differentiation ( $F_{ST}$ ), pairwise genetic distances ( $D_{XY}$ ) and nucleotide diversity ( $\pi$ ) between  
227 the three taxa studied were estimated along the genome in overlapping 25 kb windows  
228 (with 5 kb steps) using the popgenWindows.py script (available from [https://github.com/simonhmartin/genomics\\_general](https://github.com/simonhmartin/genomics_general)).  
229

## 230 2.8 RNA extraction and sequencing

231 Ovaries stored in RNALater were further dissected into pre-vitellogenic (i.e., before yolk  
232 deposition) follicles, vitellogenic follicles, and choriogenic follicles + chorionated eggs (the  
233 chorion is the proteinaceous “eggshell” of an insect egg). Each of these three subsets was  
234 processed separately. Tissue was blotted dry with Kimwipes to remove excess RNALater  
235 solution, transferred to TRIZOL and homogenized with the PRO200 tissue homogenizer  
236 (PRO Scientific). RNA was extracted with the Direct-zol RNA miniprep kit (Zymo R2051).  
237 The mRNA libraries were prepared by the Harvard University Bauer Core with the KAPA  
238 mRNA HyperPrep kit, with mean fragment insert sizes of 200-300bp, and were sequenced  
239 on a NovaSeq S2, producing an average of 49 million paired-end, 50 bp reads per library  
240 (Table S2).

241 RNASeq reads were mapped to the *H. melpomene* v2.5 transcriptome (Pinharanda *et al.*,  
242 2019) using kallisto (Bray *et al.*, 2016). Approximately 70% of reads were mapped to the  
243 transcriptome per sample, and that value did not differ between the *H. pardalinus but-*  
244 *leri* samples and the backcrosses (Table S2). Aligned reads were normalized to account  
245 for sequencing coverage, transcript length, and RNA composition using sleuth (Pimentel  
246 *et al.*, 2017). Raw counts were log-transformed, and expression differences were calculated  
247 by comparing the likelihood of the model:  $\ln(counts) \sim 1$  to the model  $\ln(counts) \sim$   
248  $1 + binaryscore$  (Pimentel *et al.*, 2017).

249 In order to identify conserved genes expressed in butterfly oogenesis, we used BLAST to  
250 identify *H. melpomene* transcripts orthologous to genes expressed in the ovarian transcrip-  
251 tome of the Speckled Wood butterfly *Parage aegeria* (Carter *et al.*, 2013). In addition, we  
252 used OrthoFinder (Emms & Kelly, 2019) to identify transcripts with orthologous genes in  
253 *Drosophila melanogaster*, and then filtered this list with the keywords “oogenesis” OR “fol-  
254 licle” OR “nurse” OR “oocyte” using the phenotypic data on Flybase ([http://flybase.](http://flybase.org)  
255 [org](http://flybase.org)).

### 256 3 Results

257 We reared 143 F1 hybrid offspring of *H. p. butleri* and *H. p. sergestus*. Female F1s in both  
258 directions of cross were sterile. To investigate the molecular and genetic basis of hybrid  
259 sterility between the two populations, we backcrossed fertile F1 hybrid males to both parental  
260 species, rearing 320 offspring. F1 and backcross broods eclosed with approximately equal  
261 sex ratios (69 females:73 males and 164 females:156 males, respectively), which suggests a  
262 lack of sex bias in immature stage viability.

263 Almost all individuals from parental populations contained developing follicles that reached  
264 the final stages of vitellogenesis, and most had fully developed eggs ( $n=11/12$ ). However,  
265 ovaries of F1 hybrids seemed devoid of developing oocytes (Fig. 2). Female backcrosses  
266 with *H. p. butleri* mothers yielded an approximately bimodal distribution of ovary phe-  
267 notypes (Fig. 2B), while a small samples of backcross females ( $n=8$ ) to *H. p. sergestus* ex-  
268 hibited a skewed distribution, with mostly sterile individuals (Fig. 2B).

269 All F1 and backcross individuals had early-stage follicles, but sterile individuals showed  
270 arrested development after oocytes reached approximately stage 3. This stage marks a de-  
271 velopmental timepoint after oocyte vs. nurse cell differentiation and follicle formation, but  
272 before vitellogenesis (yolk deposition) (Yamauchi & Yoshitake, 1984; Büning, 1994). Using

273 the 42 individuals for which we could confidently assign the latest developmental stage and  
274 fertility score, we verified that the two metrics were highly correlated (logistic regression,  
275  $p = 2.45 \times 10^{-11}$ , Supplementary Fig. S2).

### 276 3.1 QTL mapping

277 We sequenced 87 females from 7 families produced by backcrossing F1 males to *H. p. but-*  
278 *leri* females. Using RADSeq reads aligned to Hmel2.5 reference genome, the linkage map  
279 for these individuals comprised 124,456 markers across 21 chromosomes, with a total map  
280 length of 1106.95 cM (Supplementary table S1 and Figs. S3-S6).

281 Scanning the genome for additive, single locus QTLs associated with fertility score ( $H_1$ )  
282 revealed a broad central region on the Z chromosome (Figs. 4, S8, Tables 1, S3). The maxi-  
283 mum LOD value was observed at 29.2 cM (Fig. 4B, C), with mean predicted fertility scores  
284 of 1.81 for the *H. p. butleri* allele and 0.93 for the *H. p. sergestus* allele ( $R^2 = 0.20$ ). The  
285 *H. p. butleri* allele had higher predicted fertility scores than the *H. p. sergestus* allele all  
286 along the Z chromosome, but the difference declined to nearly zero towards the distal end  
287 of the chromosome.

288 When scanning for interacting QTLs we identified a negative interaction between a pair of  
289 loci at opposing ends ( $\sim 5$  cM and  $\sim 55$  cM) of the sex chromosome, with the full epistatic  
290 model explaining 54% of the variance in fertility score (Fig. 5, Tables 1, S3). This pair  
291 of loci was highly significant ( $P < 0.001$ ) irrespective of whether we tested the combined  
292 additive effects and interaction ( $H_f$ ), the additive effect of the second locus plus the in-  
293 teraction ( $H_{fv1}$ ) or the interaction alone ( $H_{int}$ ), and was robust to family-specific effects  
294 (Fig. S8). Recombinant Z chromosomes ( $Z_{BS}$  or  $Z_{SB}$ ) had higher fitness (i.e., greater av-  
295 erage fertility scores) than either non-recombinant, ( $Z_{BB}$  or  $Z_{SS}$ ) (Fig. 5). In addition  
296 to the interacting loci on the sex chromosome, we further identified significant pairs of

297 QTLs between the Z chromosome and chromosomes 4, 12 and 15 (Table 1, Fig. 5). We  
298 then tested for the single QTL at 29.2 cM on the sex chromosome while controlling for the  
299 epistatically interacting pair of QTLs at either end. It remained significant, but its posi-  
300 tion shifted slightly to 33.86 cM. Bringing these three QTLs together in a single model ( $y$   
301  $= \mu_1 + \beta_1q_1 + \beta_2q_2 + \beta_3q_3 + \beta_4q_1q_2 + \varepsilon$ ) explained 62% of the variance in fertility score.

302 To understand these results further, we divided individuals into four groups depending on  
303 their genotypes at the two interacting loci on the Z chromosome ( $Z_{BB}$ ,  $Z_{SS}$ ,  $Z_{BS}$ ,  $Z_{SB}$ ).  
304 For each of these groups, we then plotted fertility against the fraction of the autosomes  
305 homozygous for *H. p. butleri* alleles ( $B/B$ ). We hypothesised that if sterility is driven by  
306 interactions between the Z chromosome and autosomes, this fraction should be positively  
307 correlated with fertility score for those individuals holding a  $Z_{BB}$ . As expected, for  $Z_{BB}$  in-  
308 dividuals, we found a significant positive correlation between the proportion of autosomal  
309 markers derived from *H. p. butleri* (Fig. 6A). Interestingly, we also found a significant neg-  
310 ative correlation for  $Z_{SB}$  individuals. We then conducted QTL mapping on each of these  
311 groups. For individuals with a recombinant  $Z_{SB}$  chromosome, we identified a significant  
312 interaction ( $\text{LOD}_{int} = 6.97$ ,  $P < 0.01$ ,  $R^2 = 0.79$ ) between loci at 9.3 cM on chromosome  
313 8 and 11.9 cM on chromosome 20 (Fig. 6B-D). No significant QTLs were detected for the  
314 other subgroups ( $Z_{BB}$ ,  $Z_{SS}$  and  $Z_{BS}$ ).



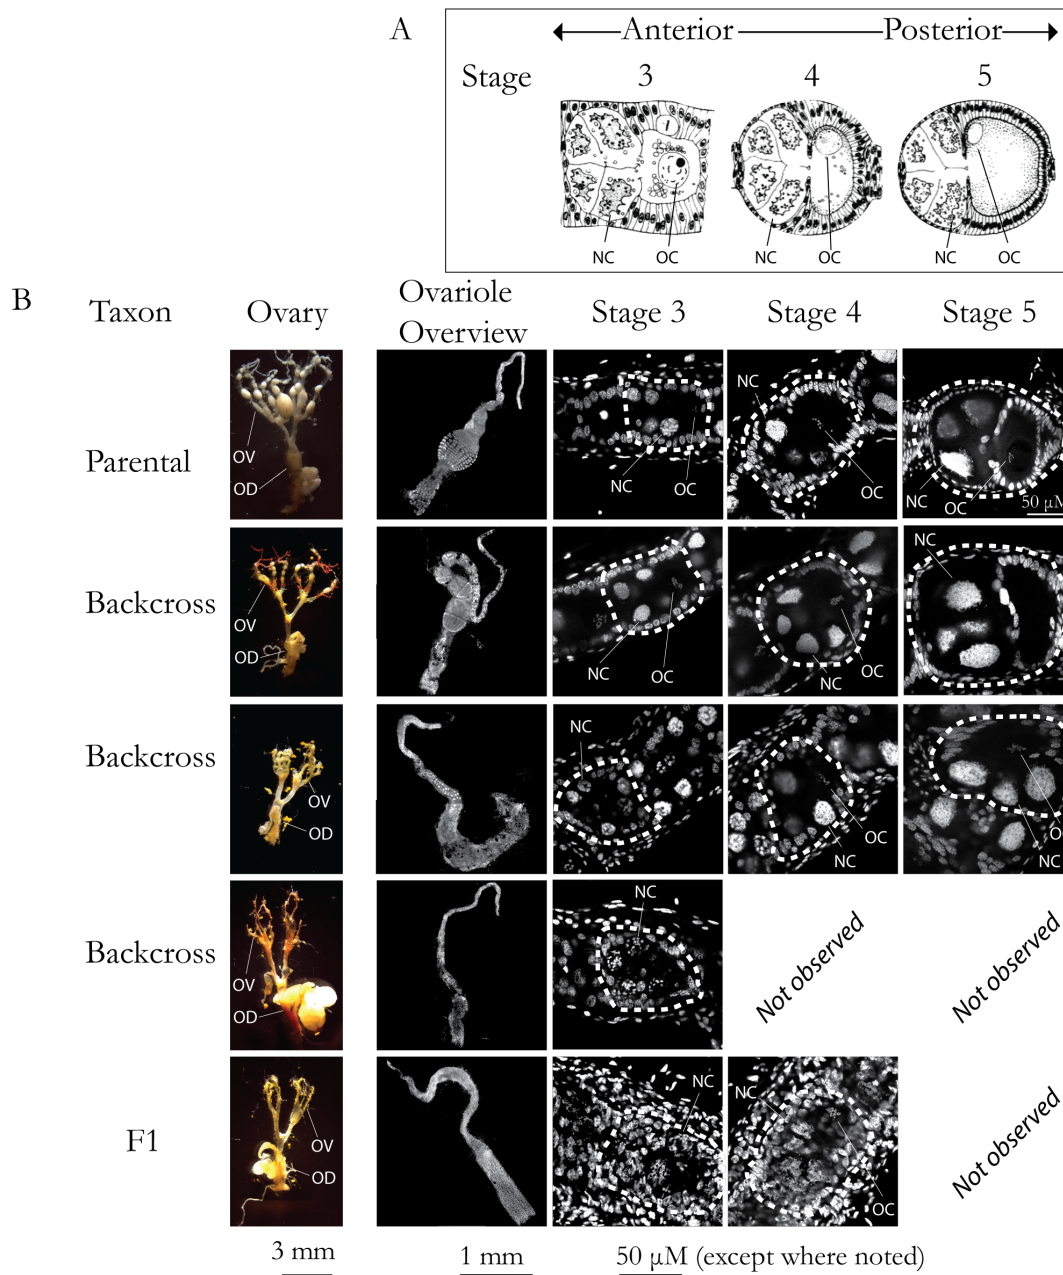

**Figure 3: Developing oocytes.** **A.** Idealized developing follicle stages (Yamauchi & Yoshitake, 1984) **B.** Brightfield and confocal images of DAPI-stained ovaries. Each row displays an overview image, as well as individual follicles at indicated stages from the same ovary. Scale bars for ovariole overviews are shown below the relevant column. Scale bar for stages 3-5 is shown below the stage 3 column, except where indicated in image. "Not observed" represent stages not present in the illustrated ovariole. In ovary images, one ovariole (OV) and the oviduct (OD) are indicated. Individual follicles are encircled by dashed lines. Where visible, one nurse cell nucleus (NC) and the oocyte cell nucleus (OC) in the highlighted follicle are indicated.

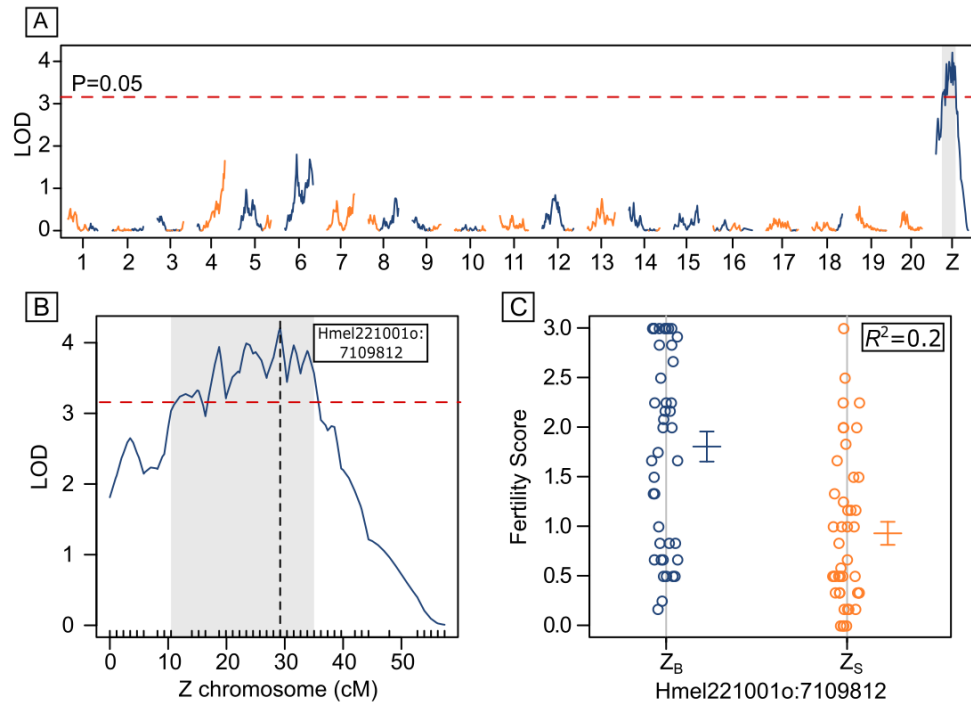

**Figure 4: Single QTL analysis.** **A.** LOD values at each marker across the genome, calculated using H-K regression and with reads aligned to Hmel2.5. The red dashed line indicates the genome-wide significance threshold ( $p < 0.05$ ; 10,000 permutations), and the grey shaded area the Bayesian credible intervals for the peak on Z. Lines are coloured depending on whether the *H. p. butleri* allele (blue) or the *H. p. sergestus* allele (yellow) had higher fertility. **B.** Enlargement of Z chromosome, with the QTL peak at 29.21 cM indicated by the vertical dashed line (corresponding to physical position Hmel221001o:7109812). **C.** Fertility scores at the QTL peak Z markers are hemizygous and coded by a single letter (B = *H. p. butleri* and S = *H. p. sergestus*), and explain 20% of the variance in fertility score. Errors bars are standard errors.

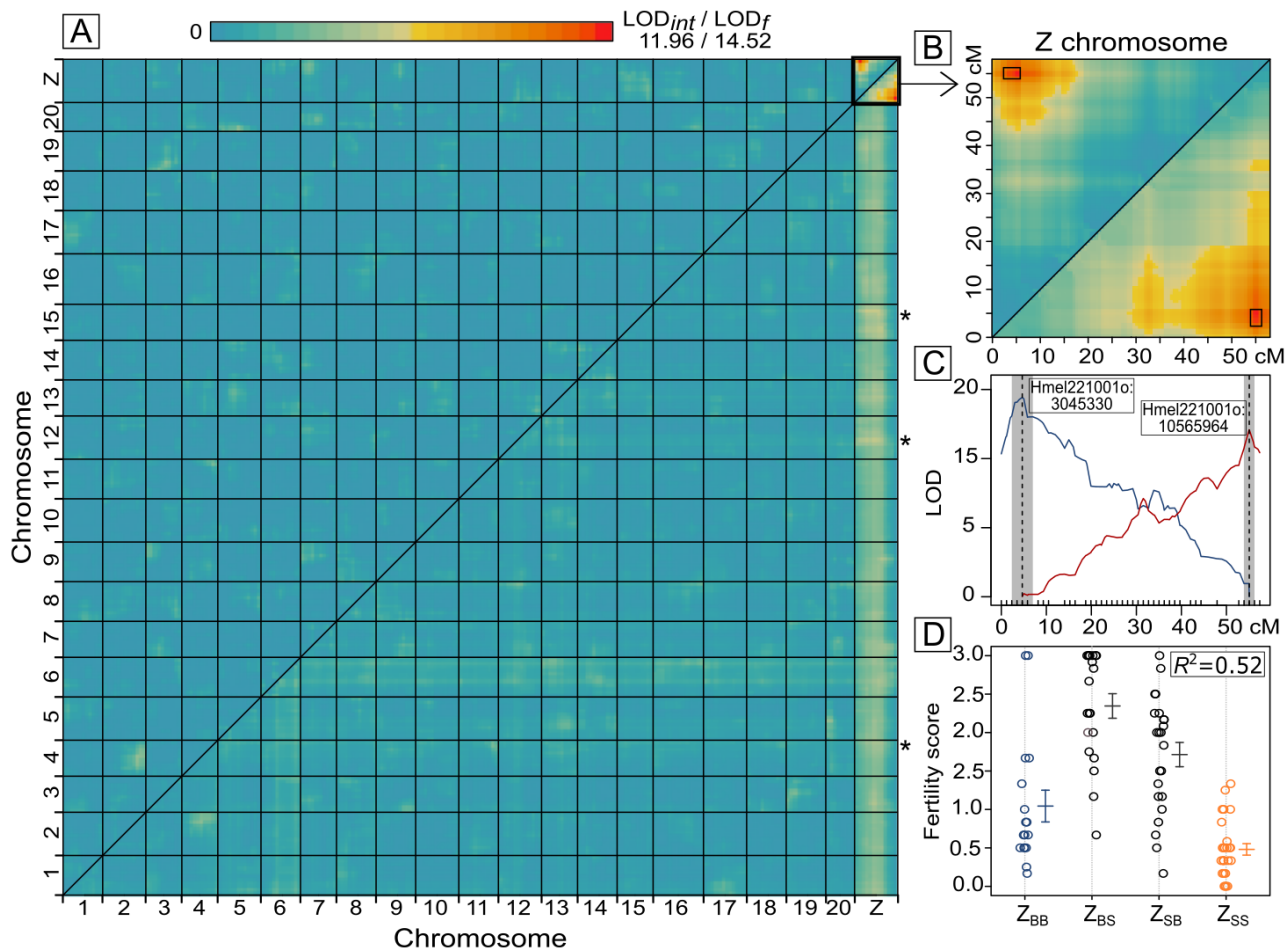

**Figure 5: Multiple QTL analysis.** **A.** Heat map for LOD<sub>f</sub> values (the full model; lower right triangle) and LOD<sub>int</sub> scores (the interaction component; upper left triangle) between pairwise combinations of markers across the genome, using H-K regression and reads aligned to Hmel2.5. Blues indicate low scores, reds indicate high scores (maximum observed LOD<sub>int</sub> = 11.96, maximum observed LOD<sub>f</sub> = 14.52). Statistically significant LOD<sub>f</sub> values between the Z chromosome and the autosomes are marked with an asterisk. **B.** Enlargement of the Z chromosome, with the Bayesian credible intervals of the significant interaction shown as black boxes. **C.** Profile LOD curves for the epistatic QTL on Z chromosome, with the blue line for the proximal QTL and the red line for the distal QTL. The vertical dotted lines give the positions of the QTL peaks, and the grey shaded errors indicate the Bayesian credible intervals. The physical positions of the markers at the QTL peaks are shown in the text boxes. **D.** Fertility scores for 87 backcross individuals grouped by their haplotypes at the two interacting markers on the Z chromosome (Hmel221001o:3045330 and Hmel221001o:10565964). These four haplotypes explain 52% of the variance in fertility score. Unrecombined pairs of markers inherited from *H. p. butleri* (Z<sub>BB</sub>) or *H. p. sergestus* (Z<sub>SS</sub>) are coloured blue and orange, respectively. Errors bars are standard errors.

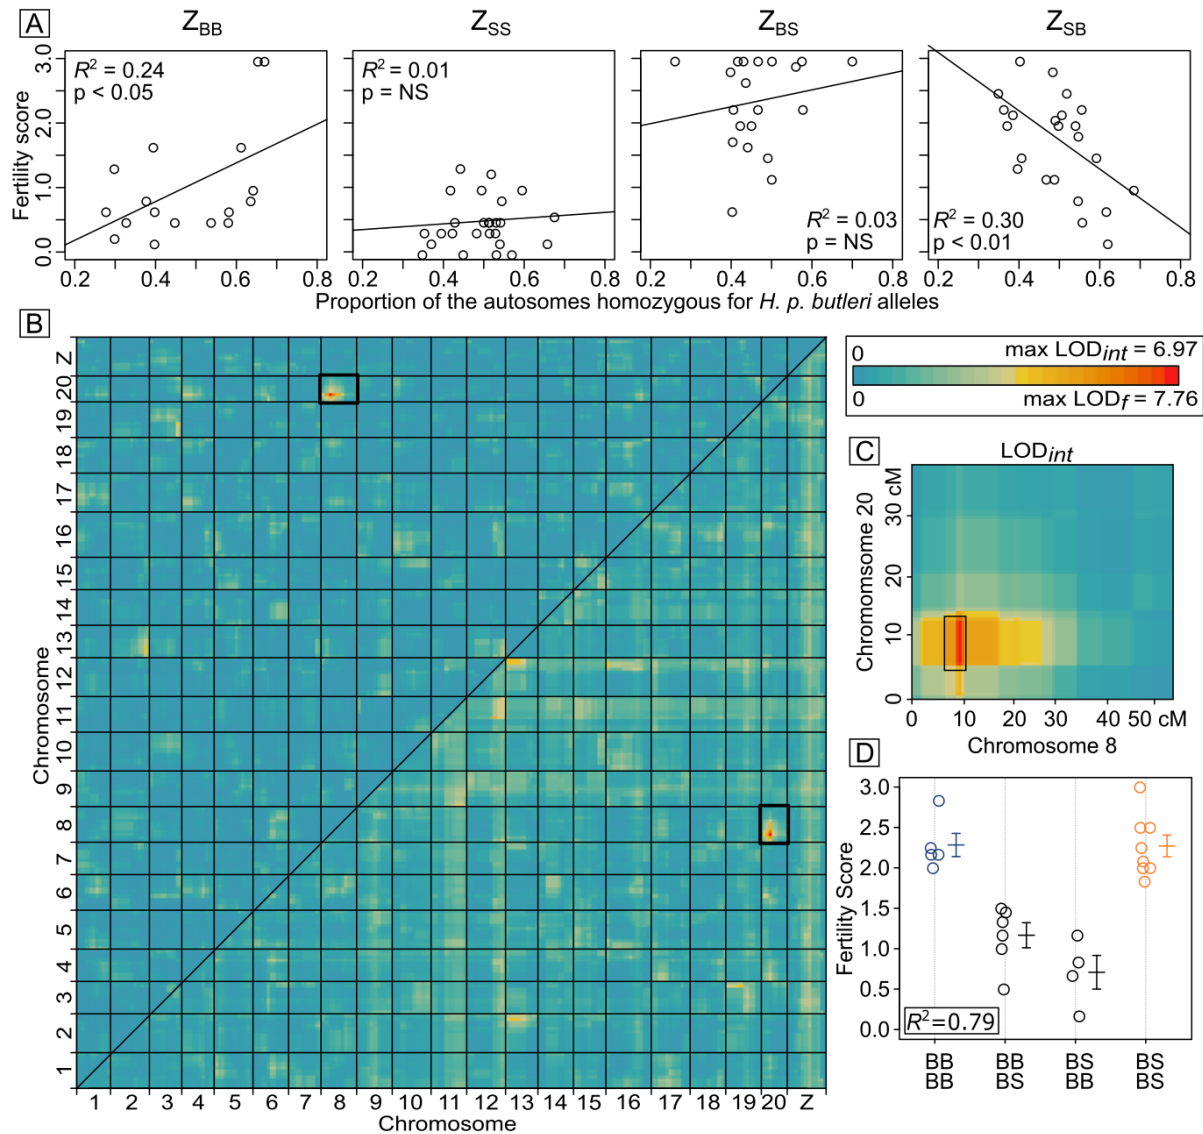

**Figure 6: Analysis of Z linked epistatic markers.** **A.** For each Z chromosome haplotype ( $Z_{BB}$ ,  $Z_{SS}$ ,  $Z_{BS}$ ,  $Z_{SB}$ ), the proportion of the autosome that is homozygous for *H. p. butleri* alleles was plotted against fertility score. **B.** Heat map for two dimensional QTL scan using only  $Z_{SB}$  individuals.  $LOD_f$  values are shown in the lower right triangle) and  $LOD_{int}$  values in the upper left triangle. The highlighted box shows the significant associations identified between chromosomes 8 and 20. **C.** Enlargement of  $LOD_{int}$  between chromosome 8 and chromosome 20, with the Bayesian credible intervals of the QTLs shown as black boxes. **D.** Fertility scores for the four autosomal genotypes of  $Z_{SB}$  individuals, with the genotype at chromosome 8 (Hmel208001o:1005579) written above, and the genotype at chromosome 20 (Hmel220003o:5817143) written below. These genotypes explain 79% of the variance in fertility score. Errors bars are standard errors.

| LOD <sub>f</sub> | chr | QTL1 marker             | cM    | limits (cM)     | limits (physical)    | chr | QTL2 marker              | cM    | limits (cM)     | limits (physical)    | $\mu_1$          | $\beta_{1q1}$    | $\beta_{2q2}$    | $\beta_{3q1q2}$  | R <sup>2</sup> |
|------------------|-----|-------------------------|-------|-----------------|----------------------|-----|--------------------------|-------|-----------------|----------------------|------------------|------------------|------------------|------------------|----------------|
| 4.21**           | Z   | Hmel221001o:<br>7109812 | 29.21 | 10.49-<br>35.02 | 4710269-<br>7966755  |     |                          |       |                 |                      | 1.370.09         | 0.88±<br>0.19*** |                  |                  | 0.2            |
| 6.72+            | 4   | Hmel204001o:<br>9208991 | 49.03 | 25.72-<br>49.03 | 6102423-<br>7036†    | Z   | Hmel221001o:<br>7109812  | 29.21 | 15-<br>36.19    | 5201659-<br>7976401  | 1.32±<br>0.09*** | -0.56±<br>0.18** | 0.81±<br>0.18*** | -0.59±<br>0.37   | 0.3            |
| 6.65+            | 12  | c12.loc25               | 25    | 17.47-<br>55.93 | 5100627-<br>16319705 | Z   | Hmel221001o:<br>5752071  | 18.75 | 3.49-<br>33.86  | 2210592-<br>7862353  | 1.39±<br>0.09*** | 0.44±<br>0.18*   | 0.87±<br>0.18*** | 1±<br>0.36**     | 0.3            |
| 7.87**           | 15  | Hmel215003o:<br>8041294 | 38.48 | 10-<br>44.3     | 4230382-<br>9907975  | Z   | Hmel221001o:<br>5752071  | 18.75 | 14.07-<br>30    | 4795563-<br>7180089  | 1.34±<br>0.09*** | 0.29±<br>0.18    | 0.7±<br>0.18***  | 1.47±<br>0.36*** | 0.34           |
| 14.52***         | Z   | Hmel221001o:<br>3045330 | 4.65  | 2.33-<br>5.81   | 2179644-<br>4463341  | Z   | Hmel221001o:<br>10565964 | 55.08 | 53.91-<br>56.24 | 8861371-<br>13311117 | 1.4±<br>0.07***  | 0.6±<br>0.15***  | -0.03±<br>0.15   | -2.53±<br>0.3*** | 0.54           |
| 7.76*            | 8   | Hmel208001o:<br>1005579 | 9.3   | 8.14-<br>10     | 618400-<br>1390337   | 20  | Hmel220003o:<br>5817143  | 11.86 | 6-12            | 3012264-<br>6466723  | 1.61±<br>0.08*** | 0.24±<br>0.16    | -0.22±<br>0.16   | 2.68±<br>0.32*** | 0.79           |

**Table 1: Summary of significant single locus (H<sub>1</sub>) and two locus (H<sub>f</sub>) QTL models (using reads aligned to Hmel2.5).**

The first column gives the LOD value of the full model (H<sub>f</sub>), with the significance estimated by permutation (+P<0.1, \*P<0.05, \*\*P<0.01, \*\*\*P<0.001). The next columns are the chromosome and QTL marker (scaffold and median physical position within the peak). The centimorgan limits are the Bayesian credible intervals, and the physical limits are the nearest typed flanking markers of that interval (all physical limits were on the same scaffold as the QTL peak, except for the chromosome 4 interaction † with Z, which was on scaffold Hmel204003 of Hmel2.5). The final five columns give the parameter estimates and R<sup>2</sup> of the model.  $\beta_{1q1}$  and  $\beta_{2q2}$  are the estimated additive effects for the QTLs, i.e. the difference between the average fertility scores for the alternative genotypes, and  $\beta_{3q1q2}$  is the coefficient for the interaction between the 2 loci. Model coefficients comprise the estimated value, the standard error, and the significance (thresholds as above). The significant interaction between chromosome 8 and 20 was detected using individuals holding a Z<sub>SB</sub> chromosome only.

## 3.2 Population genomics of the Z chromosome

Nucleotide diversity ( $\pi$ ) in *H. p. sergestus* was low along the most of the Z chromosome, but higher in *H. p. butleri* and *H. p. elevatus*, which were near identical (Fig. 7A). Pairwise genetic differentiation ( $D_{xy}$ ) was very similar between all three taxa, barring a 250 kb region in the center of the Z chromosome (6.5-6.75 MB) between *H. p. butleri* and *H. p. elevatus*, where it dropped close to zero (Fig. 7B). This region was also characterised by high  $F_{ST}$  between *H. p. sergestus* and *H. p. butleri*, which falls in the centre of the additive QTL peak (Fig. 7C).  $F_{ST}$  was generally elevated at the ends of the Z chromosome as well, possibly due to the two epistatic QTLs; however, these regions also have low rates of recombination (Fig. 7C), which can lead to high  $F_{ST}$  values even in the absence of selection (Burri, 2017). Overall, the mean  $F_{ST}$  between *H. p. butleri* and *H. p. sergestus* for the Z chromosome was 0.37, making it the most divergent chromosome. The autosomes ranged from 0.23 (chromosome 3) to 0.35 (chromosome 19), with an overall mean of 0.27.

## 3.3 Differential expression analysis

The dysgenic sterility phenotype is first evident in early stage, pre-vitellogenic oocytes (Fig. 3). We focused on this region of ovaries in quantifying RNA expression differences among backcross individuals. We dissected the pre-vitellogenic (approx. stage 3 and earlier) follicles from six backcross ovaries, two of which were assigned a fertility score of 0-1, two of 1-2, and two of 2-3. We micro-dissected pre-vitellogenic follicles to investigate the specific phenotype of developmental failure in early-stage oocytes, and further classified the phenotypes with a binary scheme: 0 for absence of vitellogenic follicles, 1 for presence of any vitellogenic follicles. In each case, tissue was dissected from all four ovarioles of a single ovary, and we acquired approximately 49 million reads per individual. After filtering our data for sequencing and mapping quality, we quantified expression of 16,774 transcripts

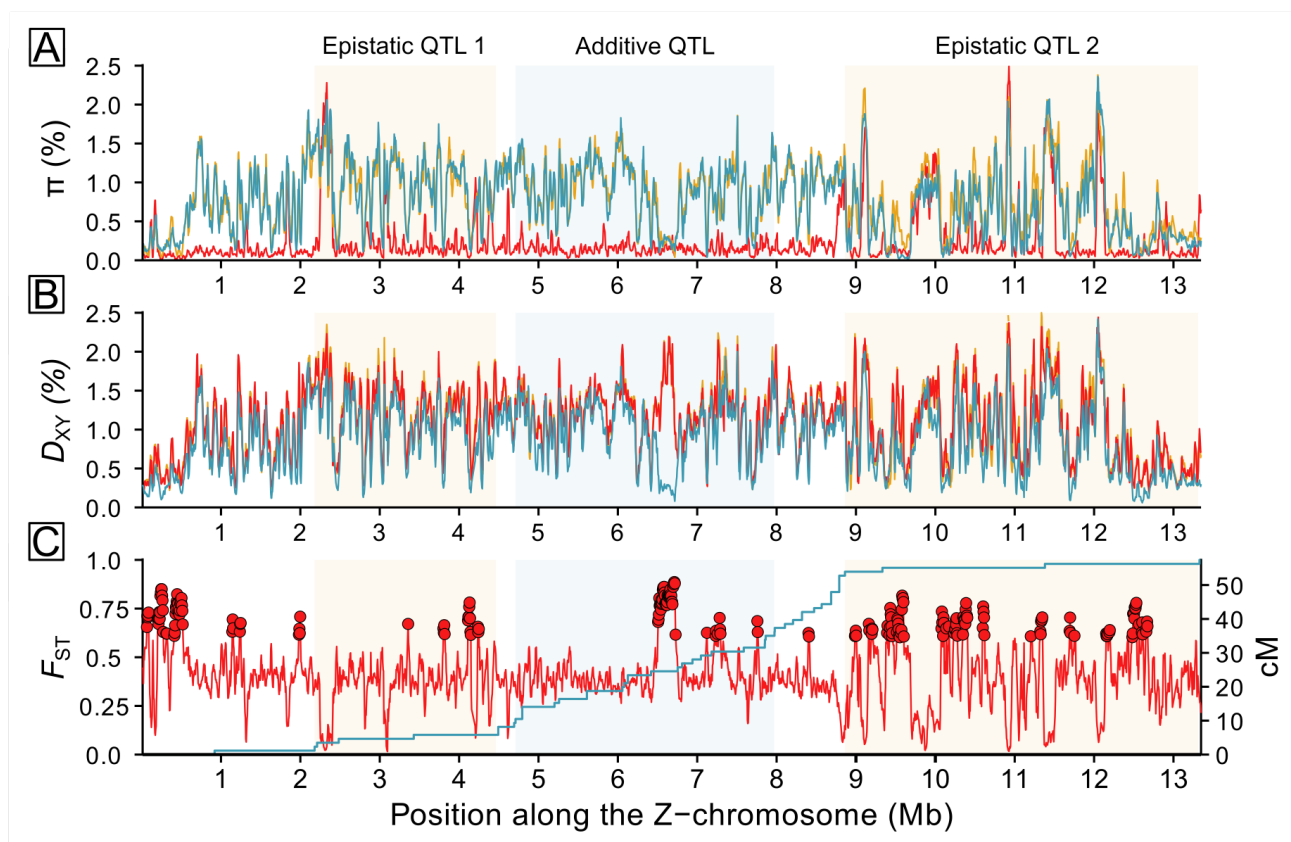

**Figure 7: Population genetic summary statistics and recombination rate along the Z chromosome.** **A.** Nucleotide diversity ( $\pi$ ) within *H. p. sergestus* (red), *H. p. butleri* (yellow), and *H. ele-vatus* (blue). **B.** Mean pairwise absolute genetic distance ( $D_{xy}$ ) between *H. p. butleri* and *H. p. sergestus* (red), *H. p. butleri* and *H. elevatus* (blue), and *H. p. sergestus* and *H. elevatus* (yellow). **C.** Genetic differentiation ( $F_{ST}$ ; red line) between *H. p. butleri* and *H. p. sergestus*, with genome-wide  $F_{ST}$  outliers as points, based on Z-scores  $> 3$ . The blue line shows genetic distance (cM) plotted against physical distance (Mb). Shaded areas correspond to the Bayesian credible intervals for the two epistatic QTL at 4.65 and 55 cM, and the single additive QTL at 29.21 cM.  $D_{xy}$  and  $F_{ST}$  were calculated in sliding windows of 25 kb (with 5 kb increments).

339 (Fig. 8).

340 We then carried out a principal components analysis of these expression data. PC1, which  
341 explains over 50% of variance, separates the three fertility score categories in order (Fig. 8B).

342 We performed a Wald test to evaluate the effect of change in expression of each transcript  
343 to the fertility phenotype in the backcrosses (Chen *et al.*, 2011). After correcting for multi-  
344 ple comparisons, a total of 14%, or 2315 transcripts showed significant effects of expression  
345 on binary phenotype ( $q < 0.05$ ) (Fig. 5C,D). Of these, 941 displayed a positive associa-  
346 tion with development, meaning that the transcript was expressed at a higher level in more  
347 highly developed ovaries. The remaining 1386 differentially expressed transcripts displayed  
348 a negative association with development. To narrow our list of candidate genes, we filtered  
349 our differentially expressed transcripts for genes implicated in butterfly oogenesis. We iden-  
350 tified 1,771 transcripts in the *H. melpomene* transcriptome that gave strong BLAST hits  
351 to genes expressed in *Pararge aegeria* eggs and ovaries (Carter *et al.*, 2013). As expected,  
352 these genes showed generally high expression levels in the sampled transcriptomes relative  
353 to other genes (Fig. 8A,B). 306 (17%) of these genes were also differentially expressed in  
354 backcrosses with different developmental phenotypes. One of the transcripts, *Trailer hitch*  
355 (*tral*), has high overall expression, strong differential expression, and is known to be in-  
356 volved in oogenesis of *D. melanogaster* and *P. aegeria* (Wilhelm *et al.*, 2005; Carter *et al.*,  
357 2013) (Fig. 8).

358 We then searched within the Bayesian credible intervals of the QTLs for differentially ex-  
359 pressed transcripts with orthologs implicated in oogenesis in either *D. melanogaster* or *P.*  
360 *aegeria* (Fig. 8). Applying this approach to the two interacting QTLs on the Z chromo-  
361 some, we identified one candidate gene (*magu*) in the first QTL 4.65 cM, and eight in the  
362 second QTL at 55 cM (*Egfr*, *fax*, *Gs2*, *Nedd8*, *parvin*, *Prm*, *sls*, *Syx7*). Within the central  
363 additive QTL on the Z chromosome at 29.2 cM, we found two candidate genes (*trol* and  
364 *csu*). In the highly region divergent region within this QTL (6.5 - 6.75 Mb, Fig. 7) there  
365 are 14 genes, one of which has an orthologue (*ncd*) required for spindle assembly in oocytes



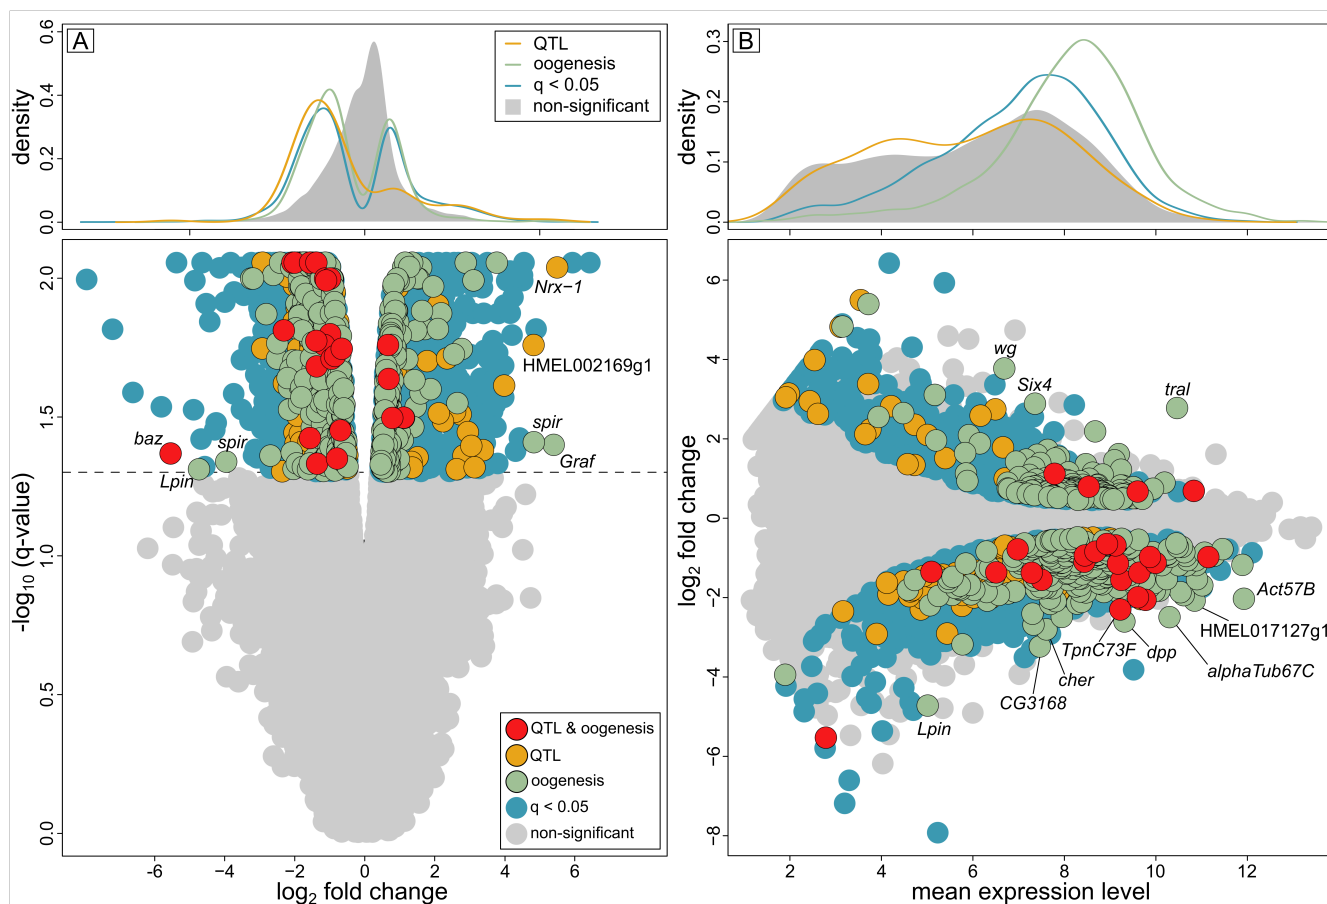

**Figure 8: Backcross differential expression. A.** Volcano plot. The change in expression between fertile (fertility score > 1.5) and sterile (fertility score  $\leq$  1.5) ovaries is plotted against the q-value. Positive values of fold change imply higher expression in fertile ovaries. Significantly differentially expressed transcripts are shown in blue, of which those with orthologues implicated in oogenesis in either *D. melanogaster* or *P. aegeria* are in green, those within the Bayesian credible intervals of QTLs on chromosomes 8, 20 and Z are shown in orange, and those fitting all these criteria are in red. QTL and/or oogenesis outliers (those with absolute fold change values in the top 1% of all transcripts) are labelled. Non-significant transcripts are in grey. The density plot shows the distribution of fold change values i) implicated in oogenesis, ii) found within QTLs, and iii) significantly differentially expressed in fertile/sterile individuals, with the density of all transcripts shaded in grey. Interestingly, most QTL transcripts are overexpressed in the sterile ovaries. **B.** Mean expression of transcripts plotted against fold change in expression. Symbols as in A, except the density plot shows the distribution of mean expression levels. Labeled QTL and/or oogenesis outliers were defined as those falling in the top 1% of transcripts ranked using mean expression  $\times$  fold change.

366 in *Drosophila* (Endow & Komma, 1997). However only three were significantly differen-  
367 tially expressed among fertile and infertile hybrids, and none of those had orthologs impli-  
368 cated in oogenesis.

369 Within the QTL at 11.86 cM on chromosome 20, we identified 11 candidates (*baz*, *CG12104*,  
370 *CG1572*, *CrebB*, *Ect4*, *Eip75B*, *ine*, *mys*, *Pitslre*, *Ran*, *TpnC73F*). In the QTL at 9.3 cM on  
371 chromosome 8, there were only 3 differentially expressed transcripts, only one of which had  
372 an orthologue known to be involved in oogenesis (*Art1*). However, one transcript (HMEL037834g1.t2,  
373 with the orthologue *Nrx-1*) stood out due to very high fold change ( $\beta = 5.51$ ) between  
374 sterile and fertile individuals, and its physical position (997,675 - 1,074,578 Mb) falls in  
375 the centre of the peak of the QTL (844,849 - 1,232,231 Mb). Genes involved in oogenesis  
376 and those significantly differentially expressed between ovaries of varying development were  
377 skewed towards being overexpressed in ovaries of females with low fertility scores. This pat-  
378 tern was even more extreme among all genes in QTL intervals, regardless of their function  
379 (Fig. 8A). This could mean that the high expression is due to a general phenomenon such  
380 as increased chromatin availability, or derepression of transcriptional regulators.

## 381 4 Discussion

382 Here, we show that crossing *H. p. butleri* and *H. p. sergestus* in both directions results in  
383 F1 hybrid females that are sterile due to disrupted oocyte development, and QTL analy-  
384 sis of backcrosses to *H. p. butleri* shows that sterility is sex-linked. We identify a strong  
385 epistatic interaction between loci at opposite ends of the Z chromosome, and a broader, ad-  
386 ditive QTL towards the centre. In addition, we identify an epistatic interaction involving  
387 the Z chromosome and chromosomes 8 and 20, as well as significant associations linking the  
388 Z chromosome with chromosomes 4, 12 and 15. By intersecting these with the results of  
389 differential expression analysis, we identify a number of candidate genes.

## 4.1 Genetics of hybrid incompatibility in *Heliconius pardalinus*

To our knowledge, this is the first study of Haldane’s Rule in Lepidoptera using modern genomic techniques to demonstrate a complex, epistatic basis of hybrid sterility, as predicted in the Dobzhansky-Muller model. Hybrids between *H. p. butleri* and *H. p. sergestus* are also consistent with the “two rules of speciation” (Coyne & Orr, 1989b). The first of these is Haldane’s rule - the tendency for greater sterility/inviability in the heterogametic sex than in the homogametic sex. There is general consensus that Haldane’s rule can be explained in part by dominance theory, which proposes that interactions between recessive X- or Z-linked alleles from one species and a hybrid autosomal genetic background cause incompatibilities in the heterogametic sex (Coyne & Orr, 2004). Although our data are consistent with dominance theory, other processes, such as faster evolution of Z-linked genes (Charlesworth *et al.*, 1987; 2018), may also have played a role in the evolution of hybrid sterility. However, because sterility manifests in females, the “faster male” hypothesis (for example due to sexual selection) can be ruled out in Lepidoptera (Orr & Turelli, 1996; Wu & Davis, 1993).

The second rule of speciation is the “large X effect” on hybrid incompatibility (in Lepidoptera, this is a large effect of the Z chromosome). In hybrids between *Drosophila mauritiana* and *D. sechellia*, the X chromosome has about four times more hybrid male sterility factors than a comparably sized autosomal region (Masly & Presgraves, 2007), and X-linked loci are involved in female, as well as male, hybrid sterility in the *D. virilis* group (Orr & Coyne, 1989). There is, in addition, a large X-effect in taxa with undifferentiated sex chromosomes (Dufresnes *et al.*, 2016; Hu & Filatov, 2016), and a large Z effect in birds (Ellegren, 2009). In Lepidoptera, sex-linked hybrid sterility has been shown in *Colias* and *Heliconius* (Grula & Taylor Jr, 1980; Jiggins *et al.*, 2001; Naisbit *et al.*, 2002), and in general the Z chromosome appears to be a hotspot for genetic differences between species (Prowell Pashley, 1998; Sperling, 1994). Here we document three sex-linked QTLs, sug-

416 gesting a large effect of the Z chromosome on hybrid sterility in *H. pardalinus* (but see  
417 [Coyne & Orr \(1989b\)](#) and [Hollocher & Wu \(1996\)](#) for caveats). The Z chromosome also has  
418 a highest mean  $F_{ST}$  of any chromosome (1.45 times greater than the mean across all the  
419 autosomes), consistent with other population genomic studies of butterfly and bird species  
420 ([Backström & Väli, 2011](#); [Van Belleghem \*et al.\*, 2018](#)). Although higher  $F_{ST}$  on the Z chro-  
421 mosome is expected from its lower effective population size ([Presgraves, 2018](#)), in combi-  
422 nation with the sex-linked QTL it is consistent with greater selection against introgressed  
423 Z-linked hybrid incompatibilities than on autosomes.

424 In *Heliconius melpomene*, crosses between Guiana and Central American populations show  
425 hybrid female sterility in only one direction of cross ([Jiggins \*et al.\*, 2001](#)). This kind of  
426 asymmetry in hybrid sterility is expected when Dobzhansky-Muller incompatibilities are  
427 relatively few, due to recent divergence ([Muller, 1942](#); [Turelli & Moyle, 2007](#)). In *H. pardal-*  
428 *inus*, crosses in both directions between *H. p. sergestus* and *H. p. butleri* produce sterile  
429 hybrid females, suggesting a more complex, multilocus cause of hybrid sterility. Moreover,  
430 if hybrid female sterility arises due to epistatic interactions between the Z chromosome and  
431 autosomes, there must be autosomal loci at which *H. p. butleri* alleles are dominant, and  
432 others at which *H. p. sergestus* alleles are dominant.

433 The observation that individuals with unrecombined Z chromosomes ( $Z_{BB}$  and  $Z_{SS}$ ) have  
434 lower average fertility than recombined Z chromosomes ( $Z_{BS}$  and  $Z_{SB}$ ) supports this (Fig. 5D).  
435 A Z chromosome inherited from *H. p. sergestus* ( $Z_{SS}$ ) will have deleterious interactions  
436 with any autosomal loci where *H. p. butleri* alleles are dominant, and so in a backcross to  
437 *H. p. butleri*, individuals carrying such a chromosome should never have full fitness. Simi-  
438 larly, individuals with a Z chromosome inherited from *H. p. butleri* ( $Z_{BB}$ ) should also have  
439 reduced fertility, because of deleterious interactions with autosomal loci with a dominant  
440 *H. p. sergestus* allele. However, in a backcross *H. p. butleri*, some fraction of offspring bear-  
441 ing unrecombined *H. p. butleri* Z chromosomes should be fully fertile; those that happen  
442 to be homozygous for *H. p. butleri* alleles at all *H. p. sergestus* autosomal dominant loci

443 that interact with the Z. Indeed, two individuals do; these are clearly visible as outliers in  
444 Fig. 5D and as predicted they have the highest proportion of their autosomes homozygous  
445 for *H. p. butleri* alleles ( $B/B$ ) (Fig. 6A).

446 It is less easy to explain why individuals holding a recombined  $Z_{BS}$  or  $Z_{SB}$  chromosome on  
447 average have higher fertility than unrecombined chromosomes. Male hybrid sterility be-  
448 tween Bogotá and US populations of *Drosophila pseudoobscura* is the product of complex  
449 epistasis between seven genes which includes interactions between sex linked markers (Orr  
450 & Irving, 2001; Phadnis, 2011). Subsequent work on *D. pseudoobscura* and *D. persimilis*  
451 has shown that epistasis can even modify the dominance of loci causing hybrid male steril-  
452 ity (Chang & Noor, 2010). Given this potential for complexity, a complete explanation of  
453 the epistatic interactions in our crosses requires further work. Nonetheless, we note that if  
454 *H. p. butleri* and *H. p. sergestus* have differentially fixed derived alleles at opposing ends  
455 of the Z chromosome, one of these recombinants could represent the ancestral haplotype.  
456 For example, the high fitness of individuals bearing a  $Z_{BS}$  chromosome could potentially be  
457 explained if it were ancestral, and thus compatible with many alleles at autosomal loci.

458 In contrast,  $Z_{SB}$  individuals are notable for high variance in fertility (Fig. 5D). They show  
459 a negative correlation between fertility and the proportion of their autosomes that is ho-  
460 mozygous for *butleri* alleles (Fig. 6A), and the variance in their fertility can be explained  
461 largely by an interaction between chromosome 8 and chromosome 20 (Table 1, Fig. 6B).  
462 Females that are either homozygous or heterozygous at both loci are fully fertile, but indi-  
463 viduals homozygous at one locus and heterozygous at the other are less fertile (Fig. 6D).  
464 As such, it is unclear whether this pair of loci have any effect on the sterility of F1 females,  
465 even though they clearly have some effect in the backcross we studied here.

## 4.2 Candidate genes and comparison with *Drosophila* hybrid incompatibility loci

Oocyte development fails in sterile hybrid females in *H. pardalinus* at Lepidoptera stages 3-4 (Fig 3) (homologous with stages 8-9 of oogenesis in *D. melanogaster*), a period characterised by border follicle cell migration (Yamauchi & Yoshitake, 1984). Within the Bayesian credible intervals of the sex-linked QTL that interacts with QTLs on chromosomes 8 and 20, we identified 24 transcripts differentially expressed between sterile and fertile females with orthologs known to be involved in oogenesis in either *D. melanogaster* or the Speckled Wood butterfly (*P. aegeria*). Three of these are known to be associated with border follicle cells.

Within the proximal epistatic Z-linked QTL at 4.65 cM, we identified only one candidate gene, *magu*, mutants of which are known to cause defective border cell migration in *D. melanogaster* (Raza *et al.*, 2019). Within the distal Z-linked QTL at 55.08 cM, 8 candidate genes were identified. One of these, *Epidermal growth factor receptor* (*Egfr*), guides dorsal migration of border cells during *Drosophila* oogenesis stage 9 (Duchek & Rørth, 2001), and is also expressed in the ovarian transcriptome of *P. aegeria* (Carter *et al.*, 2013). We found 11 candidates involved in oogenesis within the QTL on chromosome 20. One of these, the multi-PDZ domain protein *bazooka* (*baz*), regulates border cell migration (Pinheiro & Montell, 2004), is expressed in the *P. aegeria* ovarian transcriptome, and furthermore is notable for being highly overexpressed in sterile individuals ( $\log_2$  fold change = -5.52 for transcript HMEL016161g1.t3, the sixth lowest value in the dataset [Fig. 8A]). On chromosome 8, HMEL037834g1.t2, with ortholog *Neurexin 1* (*Nrx-1*), stood out as having the third highest  $\log_2$  fold change (5.51) in the dataset. While not known to be involved in oogenesis, *Neurexin 1* is known to influence expression of *gurken* (*grk*) (Geng & Macdonald, 2007). The asymmetrical localization of *gurken* mRNA is key for its function during oogenesis, to establish anterior-posterior and dorso-ventral axes in the egg and embryo, and *gurken* en-

492 codes a TGF $\alpha$  family signaling ligand that activates the intracellular MAP kinase pathway  
493 via the the product of *Egfr*.

494 Differentially expressed transcripts located within QTL intervals, such as those discussed  
495 above, represent candidate regions for *cis*-acting differences between the two subspecies. In-  
496 vestigation of differential expression on its own, we can also identify putative trans-acting  
497 effects, or downstream consequences of the QTLs identified here. *Trailer-hitch* (*tral* has  
498 strong differential expression, high overall expression in ovaries, and is known to be in-  
499 volved in *Drosophila* oogenesis at stages 8-9 (Fig. 8, Fig. S9) (Wilhelm *et al.*, 2005; Snee  
500 & Macdonald, 2009). Like *Nrx-1*, *tral* is involved in specifying the localization of the dorso-  
501 ventral patterning gene *grk*.

502 We also noticed that alternative splices of transcript HMEL015815g1, orthologous to gene  
503 *spire* (*spir*) stood out as outliers in Fig. 8A. Although mapping to chromosome 1 and not  
504 in a QTL, HMEL037834g1.t2 was significantly underexpressed in sterile individuals ( $\log_2$   
505 fold change = 4.85), and HMEL015815g1.t6 significantly overexpressed ( $\log_2$  fold change  
506 = -3.94). *spire* is involved specifically in stages 8-9 of oogenesis in *D. melanogaster*, where  
507 it affects the dorsal-ventral and anterior-posterior axes of the egg (Dahlgard *et al.*, 2007;  
508 Wellington *et al.*, 1999).

509 The genus *Drosophila melanogaster* has long been used as a model to study developmental  
510 genetics, including the genetic basis of hybrid sterility. Some classical Dobzhansky-Muller  
511 incompatibilities have been identified and characterized in the genus (Brideau *et al.*, 2006;  
512 Tang & Presgraves, 2009; Bayes & Malik, 2009). Because *Drosophila* has XY sex determi-  
513 nation, in hybrids it is normally males that show sterility (Haldane, 1922). However, hybrid  
514 female dysgenesis has been observed in *D. melanogaster* in so-called P-M hybrids, in which  
515 oogenesis arrests at a very early stage (Kidwell *et al.*, 1977; Schaefer *et al.*, 1979; Bing-  
516 ham *et al.*, 1982). This phenotype is due to a loss of control of P element transposition,  
517 normally suppressed via the *Drosophila* piRNA pathway in P strain flies (Evgen'ev *et al.*,

518 1997; Kelleher *et al.*, 2012). Superficially, the *Heliconius* sterility phenotype described in  
519 this study parallels this *Drosophila* case. The hypothesis that transposon silencing through  
520 the piRNA pathway is mis-regulated in sterile female hybrids has been explicitly tested  
521 in a different *Heliconius* hybrid system, *H. melpomene* and *H. cydno*. A subset of trans-  
522 posable elements were indeed derepressed in F1 hybrids, but there was no evidence that  
523 piRNAs themselves or three proteins involved in the piRNA pathway were misexpressed  
524 (Pinharanda, 2017). In our case, low fertility *H. pardalinus* female hybrids expressed three  
525 proteins in the piRNA pathway (*piwi/aubergine*, *AGO2/3*, and *vasa*) at lower levels than in  
526 more fertile individuals, though only *vasa* expression differences were significant (Fig. S9).  
527 In addition, one of our candidate genes, *tral*, forms a complex with piRNA proteins that  
528 inhibits P element transposition of a variety of transposons Liu *et al.* (2011). A *Drosophila*-  
529 like transposon derepression mechanism is therefore plausible, but the evidence remains  
530 inconclusive at present.

### 531 4.3 Evolution of hybrid incompatibilities

532 *Heliconius p. sergestus* is endemic to the dry forests of upper Huallaga valley in the An-  
533 des, and is separated from *H. p. butleri* in the Amazonian lowlands by the intervening  
534 Cordillera Escalera (Fig. 1). Nonetheless, the two subspecies are known to come into con-  
535 tact occasionally, and some putative wild hybrids exist (Michel Cast *pers. comm.*; Brown,  
536 1976; Rosser *et al.*, 2019). Theory predicts that in the face of gene flow, DMIs are more  
537 likely to be maintained when they are linked to traits involved in divergent adaptations  
538 (Bank *et al.*, 2012), and *Heliconius* provide a possible example of this (Merrill *et al.*, 2011).  
539 Divergent selection to different habitats could thus have facilitated the evolution of steril-  
540 ity within *H. pardalinus*, in a similar fashion to hybrid inviability evolving between plant  
541 populations as a pleiotropic consequence of adaptations to heavy metals (Macnair & Christie,  
542 1983).



543 However, an alternative hypothesis is that hybrid sterility arose during an initial split be-  
544 tween *H. elevatus* and *H. pardalinus*, only to be lost by hybridisation between sympatric  
545 populations in the Amazon, but retained in the allopatric subspecies *H. p. sergestus*. Con-  
546 catenated whole genome phylogenies are consistent with this: *H. pardalinus* is paraphyletic,  
547 with *H. p. butleri* more closely related to the widespread Amazonian species *H. eleva-*  
548 *tus* than to *H. p. sergestus* ([Heliconius Genome Consortium, 2012](#); [Rosser et al., 2019](#)).  
549 Moreover, despite strong assortative mating, *H. p. butleri* and *H. elevatus* are known to be  
550 fully fertile, while crosses between *H. p. sergestus* and *H. elevatus* are sterile, with pheno-  
551 types similar to those found here between *H. p. sergestus* and *H. p. butleri* ([Rosser et al.,](#)  
552 [2019](#)). Intriguingly, in the central 250 kb region of high  $F_{ST}$  between *H. p. sergestus* and  
553 *H. p. butleri* (Fig. 7C), we observed a reduction in  $D_{xy}$  between the Amazon taxon *H. p. but-*  
554 *leri* and *H. elevatus* (Fig. 7B). The notable drop in diversity ( $\pi$ ) in this same region in  
555 both *H. p. butleri* and *H. elevatus* (Fig. 7A) suggests a strong, recent selective sweep that  
556 also introgressed between these sympatric populations. Given that this region is in the mid-  
557 dle of the main Z chromosome QTL for sterility between *H. p. butleri* and *H. p. sergestus*,  
558 introgression of this region is a candidate for explaining the lack of hybrid sterility between  
559 *H. elevatus* and *H. p. butleri* in the Amazon.

## 560 5 Conclusions

561 The genetics of Haldane's Rule and Dobzhansky-Muller incompatibilities have been ex-  
562 tensively studied in *Drosophila* and a few other male heterogametic systems, but hitherto  
563 there has been little genomic work on female heterogametic systems. Our work with *Heliconius*  
564 *conius* butterflies represents the first such study in Lepidoptera. We employ thousands of  
565 markers across the genome to map multiple regions involved in hybrid female sterility, and  
566 show an especially large effect of the Z chromosome. By intersecting these results with the  
567 list of differentially expressed genes among fertile and sterile hybrids, we identify six can-

568 didate genes (*magu*, *Egfr*, *baz*, *Nrx-1*, *tral*, and *spir*) potentially involved in hybrid steril-  
569 ity. Many questions remain unanswered, and functional genetic studies will be required  
570 to understand the mechanisms of ovariole development failure in hybrids. Nonetheless,  
571 we were able to show that several of the major findings from studies of Haldane's Rule in  
572 *Drosophila* male sterility (e.g., multilocus effects, epistasis, involvement of the sex chro-  
573 mosome) are replicated in female sterile hybrids in a female heterogametic system. Future  
574 work can now address the genetic basis of sterility, as well as the potential tie-in with self-  
575 ish genetic elements and with genes that act to defend the genome against their replication.

## 576 **6 Data Availability Statement**

577 The data that support the findings of this study will be made openly available on a public  
578 database following acceptance of the article.

## 579 **7 Acknowledgements**

580 This work was funded by NERC grant NE/K012886/1 to KKD and Harvard University.  
581 We also thank SERFOR, the Peruvian Ministry of Agriculture, and the Área de Conser-  
582 vación Regional Cordillera Escalera for collecting permits (0289-2014-MINAGRI-DGFFS/DGEFFS,  
583 020-014/GRSM/PEHCBM/DMA/ACR-CE, 040-2015/GRSM/PEHCBM/DMA/ACR-CE).  
584 We are extremely grateful to the following people for help and support with field work in  
585 Peru: Ronald Mori Pezo, Corita Cordova, Mario Tuanama, Jarreth Caldwell, Christian  
586 Pérez, César López, Stephanie Galluser, and Gerardo Lamas. We are also very grateful  
587 to Pasi Rastas for guidance using LepMap-3, and to Michael Turelli and Daven Presgraves  
588 for helpful discussions regarding QTL results. We thank Shreeharsha Tarikere and Wendy  
589 Valencia-Montoya for commenting on the manuscript.

## References

- 590
- 591 Backström, N. & Väli, Ü. (2011) Sex- and species- biased gene flow in a spotted eagle hy-  
592 brid zone. *BMC evolutionary biology* **11**, 1–9.
- 593 Bank, C., Bürger, R. & Hermisson, J. (2012) The limits to parapatric speciation:  
594 Dobzhansky–Muller incompatibilities in a continent–island model. *Genetics* **191**, 845–  
595 863.
- 596 Bateson, W. (1909) Heredity and variation in modern lights. *Darwin and Modern Science*  
597 (ed. A.C. Seward), pp. 85–101, Cambridge University Press, Cambridge, UK.
- 598 Bayes, J.J. & Malik, H.S. (2009) Altered heterochromatin binding by a hybrid sterility pro-  
599 tein in *Drosophila* sibling species. *Science* **326**, 1538–1541.
- 600 Bingham, P.M., Kidwell, M.G. & Rubin, G.M. (1982) The molecular basis of PM hybrid  
601 dysgenesis: the role of the P element, a P-strain-specific transposon family. *Cell* **29**, 995–  
602 1004.
- 603 Bray, N.L., Pimentel, H., Melsted, P. & Pachter, L. (2016) Near-optimal probabilistic RNA-  
604 seq quantification. *Nature Biotechnology* **34**, 525–527.
- 605 Brideau, N.J., Flores, H.A., Wang, J., Maheshwari, S., Wang, X. & Barbash, D.A. (2006)  
606 Two Dobzhansky-Muller genes interact to cause hybrid lethality in *Drosophila*. *Science*  
607 **314**, 1292–1295.
- 608 Broman, K.W., Wu, H., Sen, S. & Churchill, G.A. (2003) R/qtl: QTL mapping in experi-  
609 mental crosses. *Bioinformatics* **19**, 889–890.
- 610 Brown, K.S. (1976) An illustrated key to the silvaniform *Heliconius* (lepidoptera: Nymphal-  
611 idae) with descriptions of new subspecies. *Transactions of the American Entomological*  
612 *Society* **102**, 373–484.

- 613 Bünig, J. (1994) *The Insect Ovary: Ultrastructure, Previtellogenic Growth and Evolution*.  
614 Springer Science & Business Media, Berlin.
- 615 Burri, R. (2017) Interpreting differentiation landscapes in the light of long-term linked se-  
616 lection. *Evolution Letters* **1**, 118–131.
- 617 Butlin, R., Debelle, A., Kerth, C., Snook, R.R., Beukeboom, L.W., Castillo, R.C., Diao,  
618 W., Maan, M.E., Paolucci, S., Weissing, F.J. *et al.* (2012) What do we need to know  
619 about speciation? *Trends in Ecology & Evolution* **27**, 27–39.
- 620 Carter, J.M., Baker, S.C., Pink, R., Carter, D.R., Collins, A., Tomlin, J., Gibbs, M. &  
621 Breuker, C.J. (2013) Unscrambling butterfly oogenesis. *BMC Genomics* **14**, 283.
- 622 Castillo, D.M. & Barbash, D.A. (2017) Moving speciation genetics forward: modern tech-  
623 niques build on foundational studies in *Drosophila*. *Genetics* **207**, 825–842.
- 624 Catchen, J., Hohenlohe, P.A., Bassham, S., Amores, A. & Cresko, W.A. (2013) Stacks: an  
625 analysis tool set for population genomics. *Molecular Ecology* **22**, 3124–3140.
- 626 Chang, A.S. & Noor, M.A. (2010) Epistasis modifies the dominance of loci causing hybrid  
627 male sterility in the drosophila pseudoobscura species group. *Evolution: International*  
628 *Journal of Organic Evolution* **64**, 253–260.
- 629 Chang, C.C., Chow, C.C., Tellier, L.C., Vattikuti, S., Purcell, S.M. & Lee, J.J. (2015)  
630 Second-generation PLINK: rising to the challenge of larger and richer datasets. *Giga-*  
631 *science* **4**, s13742–015.
- 632 Charlesworth, B., Campos, J.L. & Jackson, B.C. (2018) Faster-x evolution: Theory and  
633 evidence from drosophila. *Molecular ecology* **27**, 3753–3771.
- 634 Charlesworth, B., Coyne, J.A. & Barton, N.H. (1987) The relative rates of evolution of sex  
635 chromosomes and autosomes. *The American Naturalist* **130**, 113–146.

- 636 Chen, Z., Liu, J., Ng, H.K.T., Nadarajah, S., Kaufman, H.L., Yang, J.Y. & Deng, Y.  
637 (2011) Statistical methods on detecting differentially expressed genes for RNA-seq data.  
638 *BMC Systems Biology* **5**, S1.
- 639 Corbett-Detig, R.B., Zhou, J., Clark, A.G., Hartl, D.L. & Ayroles, J.F. (2013) Genetic in-  
640 compatibilities are widespread within species. *Nature* **504**, 135–137.
- 641 Coughlan, J.M. & Matute, D.R. (2020) The importance of intrinsic postzygotic barriers  
642 throughout the speciation process. *Philosophical Transactions of the Royal Society B*  
643 **375**, 20190533.
- 644 Coyne, J.A. (1992) Genetics and speciation. *Nature* **355**, 511–515.
- 645 Coyne, J.A. & Orr, H.A. (1989a) Patterns of speciation in *Drosophila*. *Evolution* **43**, 362–  
646 381.
- 647 Coyne, J.A. & Orr, H.A. (1989b) Two rules of speciation. *Speciation and its Consequences*  
648 (eds. D. Otte & J. Endler), pp. 180–207, Sinauer Associates Inc.
- 649 Coyne, J.A. & Orr, H.A. (1997) "Patterns of speciation in *Drosophila*" revisited. *Evolution*  
650 **51**, 295–303.
- 651 Coyne, J.A. & Orr, H.A. (2004) *Speciation*. Sinauer Associates, Sunderland, MA.
- 652 Dahlgaard, K., Raposo, A.A., Niccoli, T. & St Johnston, D. (2007) Capu and Spire assem-  
653 ble a cytoplasmic actin mesh that maintains microtubule organization in the *Drosophila*  
654 oocyte. *Developmental Cell* **13**, 539–553.
- 655 Darwin, C. (1859) *On the Origin of Species by Means of Natural Selection*. John Murray,  
656 London.
- 657 Davey, J.W., Barker, S.L., Rastas, P.M., Pinharanda, A., Martin, S.H., Durbin, R., McMil-  
658 lan, W.O., Merrill, R.M. & Jiggins, C.D. (2017) No evidence for maintenance of a sym-

- 659 patric *Heliconius* species barrier by chromosomal inversions. *Evolution Letters* **1**, 138–  
660 154.
- 661 Delph, L.F. & Demuth, J.P. (2016) Haldane’s rule: genetic bases and their empirical sup-  
662 port. *Journal of Heredity* **107**, 383–391.
- 663 DePristo, M.A., Banks, E., Poplin, R., Garimella, K.V., Maguire, J.R., Hartl, C., Philip-  
664 pakis, A.A., Del Angel, G., Rivas, M.A., Hanna, M. *et al.* (2011) A framework for varia-  
665 tion discovery and genotyping using next-generation dna sequencing data. *Nature Genet-*  
666 *ics* **43**, 491.
- 667 Dobzhansky, T. (1936) Studies on hybrid sterility. II. Localization of sterility factors in  
668 *Drosophila pseudoobscura* hybrids. *Genetics* **21**, 113.
- 669 Doncaster, L. & Raynor, G.H. (1906) Breeding experiments with Lepidoptera. *Proceedings*  
670 *of the Zoological Society of London* **1**, 125–133.
- 671 Duchek, P. & Rørth, P. (2001) Guidance of cell migration by EGF receptor signaling dur-  
672 ing *Drosophila* oogenesis. *Science* **291**, 131–133.
- 673 Dufresnes, C., Majtyka, T., Baird, S.J., Gerchen, J.F., Borzée, A., Savary, R., Ogielska,  
674 M., Perrin, N. & Stöck, M. (2016) Empirical evidence for large x-effects in animals with  
675 undifferentiated sex chromosomes. *Scientific reports* **6**, 1–7.
- 676 Dunlap-Pianka, H., Boggs, C.L. & Gilbert, L.E. (1977) Ovarian dynamics in heliconiine  
677 butterflies: programmed senescence versus eternal youth. *Science* **197**, 487–490.
- 678 Ellegren, H. (2009) Genomic evidence for a large-z effect. *Proceedings of the Royal Society*  
679 *B: Biological Sciences* **276**, 361–366.
- 680 Emms, D.M. & Kelly, S. (2019) Orthofinder: phylogenetic orthology inference for compara-  
681 tive genomics. *Genome Biology* **20**, 1–14.

- 682 Endow, S.A. & Komma, D.J. (1997) Spindle dynamics during meiosis in drosophila  
683 oocytes. *The Journal of cell biology* **137**, 1321–1336.
- 684 Etter, P.D., Preston, J.L., Bassham, S., Cresko, W.A. & Johnson, E.A. (2011) Local *de*  
685 *novo* assembly of RAD paired-end contigs using short sequencing reads. *PloS One* **6**.
- 686 Evgen'ev, M.B., Zelentsova, H., Shostak, N., Kozitsina, M., Barskyi, V., Lankenau, D.H.  
687 & Corces, V.G. (1997) *Penelope*, a new family of transposable elements and its possible  
688 role in hybrid dysgenesis in *Drosophila virilis*. *Proceedings of the National Academy of*  
689 *Sciences* **94**, 196–201.
- 690 Geng, C. & Macdonald, P. (2007) Identification of genes that influence *gurken* expression.  
691 *Fly* **1**, 259–267.
- 692 Good, J.M., Dean, M.D. & Nachman, M.W. (2008) A complex genetic basis to X-linked  
693 hybrid male sterility between two species of house mice. *Genetics* **179**, 2213–2228.
- 694 Grula, J.W. & Taylor Jr, O.R. (1980) Some characteristics of hybrids derived from the  
695 sulfur butterflies, *Colias eurytheme* and *C. philodice*: phenotypic effects of the x-  
696 chromosome. *Evolution* pp. 673–687.
- 697 Gullan, P.J. & Cranston, P.S. (2014) *The Insects: An Outline of Entomology*. John Wiley  
698 & Sons.
- 699 Haldane, J.B.S. (1922) Sex ratio and unisexual sterility in hybrid animals. *Journal of Ge-*  
700 *netics* **12**, 101–109.
- 701 Haley, C.S. & Knott, S.A. (1992) A simple regression method for mapping quantitative  
702 trait loci in line crosses using flanking markers. *Heredity* **69**, 315.
- 703 *Heliconius* Genome Consortium (2012) Butterfly genome reveals promiscuous exchange of  
704 mimicry adaptations among species. *Nature* **487**, 94.

- 705 Hoffman, J.I., Simpson, F., David, P., Rijks, J.M., Kuiken, T., Thorne, M.A., Lacy, R.C. &  
706 Dasmahapatra, K.K. (2014) High-throughput sequencing reveals inbreeding depression in  
707 a natural population. *Proceedings of the National Academy of Sciences* **111**, 3775–3780.
- 708 Hollocher, H. & Wu, C.I. (1996) The genetics of reproductive isolation in the drosophila  
709 simulans clade: X vs. autosomal effects and male vs. female effects. *Genetics* **143**, 1243–  
710 1255.
- 711 Hu, X.S. & Filatov, D.A. (2016) The large-x effect in plants: increased species divergence  
712 and reduced gene flow on the silene x-chromosome. *Molecular ecology* **25**, 2609–2619.
- 713 Jiggins, C.D. (2017) *The Ecology and Evolution of Heliconius Butterflies*. Oxford University  
714 Press, Oxford.
- 715 Jiggins, C.D., Linares, M., Naisbit, R.E., Salazar, C., Yang, Z.H. & Mallet, J. (2001) Sex-  
716 linked hybrid sterility in a butterfly. *Evolution* **55**, 1631–1638.
- 717 Kalirad, A. & Azevedo, R.B. (2017) Spiraling complexity: a test of the snowball effect in a  
718 computational model of RNA folding. *Genetics* **206**, 377–388.
- 719 Kelleher, E.S., Edelman, N.B. & Barbash, D.A. (2012) *Drosophila* interspecific hybrids phe-  
720 nocopy piRNA-pathway mutants. *PLoS Biology* **10**.
- 721 Kidwell, M.G., Kidwell, J.F. & Sved, J.A. (1977) Hybrid dysgenesis in *Drosophila*  
722 *melanogaster*: a syndrome of aberrant traits including mutation, sterility and male re-  
723 combination. *Genetics* **86**, 813–833.
- 724 Li, H. (2011) A statistical framework for snp calling, mutation discovery, association map-  
725 ping and population genetical parameter estimation from sequencing data. *Bioinformat-*  
726 *ics* **27**, 2987–2993.
- 727 Li, H. (2013) Aligning sequence reads, clone sequences and assembly contigs with BWA-  
728 MEM. *arXiv preprint arXiv:1303.3997* .



- 729 Li, H., Handsaker, B., Wysoker, A., Fennell, T., Ruan, J., Homer, N., Marth, G., Abecasis,  
730 G. & Durbin, R. (2009) The sequence alignment/map format and SAMtools. *Bioinfor-*  
731 *matics* **25**, 2078–2079.
- 732 Liu, L., Qi, H., Wang, J. & Lin, H. (2011) PAPI, a novel TUDOR-domain protein, com-  
733 plexes with AGO3, ME31B and TRAL in the nuage to silence transposition. *Develop-*  
734 *ment* **138**, 1863–1873.
- 735 Macnair, M. & Christie, P. (1983) Reproductive isolation as a pleiotropic effect of copper  
736 tolerance in *mimulus guttatus*? *Heredity* **50**, 295–302.
- 737 Maheshwari, S. & Barbash, D.A. (2011) The genetics of hybrid incompatibilities. *Annual*  
738 *Review of Genetics* **45**, 331–355.
- 739 Martin, M. (2011) Cutadapt removes adapter sequences from high-throughput sequencing  
740 reads. *EMBnet.journal* **17**, 10–12.
- 741 Masly, J.P. & Presgraves, D.C. (2007) High-resolution genome-wide dissection of the two  
742 rules of speciation in *Drosophila*. *PLoS Biology* **5**, e243.
- 743 Matute, D.R., Butler, I.A., Turissini, D.A. & Coyne, J.A. (2010) A test of the snowball  
744 theory for the rate of evolution of hybrid incompatibilities. *Science* **329**, 1518–1521.
- 745 McKenna, A., Hanna, M., Banks, E., Sivachenko, A., Cibulskis, K., Kernytsky, A.,  
746 Garimella, K., Altshuler, D., Gabriel, S., Daly, M. *et al.* (2010) The Genome Analysis  
747 Toolkit: a MapReduce framework for analyzing next-generation DNA sequencing data.  
748 *Genome Research* **20**, 1297–1303.
- 749 Merrill, R.M., Van Schooten, B., Scott, J.A. & Jiggins, C.D. (2011) Pervasive genetic asso-  
750 ciations between traits causing reproductive isolation in *Heliconius* butterflies. *Proceed-*  
751 *ings of the Royal Society B: Biological Sciences* **278**, 511–518.

- 752 Mihola, O., Trachtulec, Z., Vlcek, C., Schimenti, J.C. & Forejt, J. (2009) A mouse specia-  
753 tion gene encodes a meiotic histone H3 methyltransferase. *Science* **323**, 373–375.
- 754 Morgan, T.H. (1910) Sex-limited inheritance in *Drosophila*. *Science N.S.* **32**, 125–133.
- 755 Morgan, T.H. (1911) Random segregation versus coupling in Mendelian inheritance. *Sci-*  
756 *ence N.S.* **34**, 384.
- 757 Muller, H. (1942) Isolating mechanisms, evolution, and temperature. *Biological Symposia*,  
758 vol. 6. Temperature and Evolution. Isolating Mechanisms. Genetic Control of Embryonic  
759 Development., pp. 71–125.
- 760 Naisbit, R.E., Jiggins, C.D., Linares, M., Salazar, C. & Mallet, J. (2002) Hybrid sterility,  
761 Haldane’s rule and speciation in *Heliconius cydno* and *H. melpomene*. *Genetics* **161**,  
762 1517–1526.
- 763 Nosil, P. & Schluter, D. (2011) The genes underlying the process of speciation. *Trends in*  
764 *Ecology & Evolution* **26**, 160–167.
- 765 Orr, H.A. (1995) The population genetics of speciation: the evolution of hybrid incompati-  
766 bilities. *Genetics* **139**, 1805–1813.
- 767 Orr, H.A. (1997) Haldane’s rule. *Annual Review of Ecology and Systematics* **28**, 195–218.
- 768 Orr, H.A. & Coyne, J.A. (1989) The genetics of postzygotic isolation in the *Drosophila vir-*  
769 *ilis* group. *Genetics* **121**, 527–537.
- 770 Orr, H.A. & Irving, S. (2001) Complex epistasis and the genetic basis of hybrid sterility in  
771 the drosophila pseudoobscura bogota-usa hybridization. *Genetics* **158**, 1089–1100.
- 772 Orr, H.A. & Turelli, M. (1996) Dominance and haldane’s rule. *Genetics* **143**, 613.
- 773 Orr, H.A. & Turelli, M. (2001) The evolution of postzygotic isolation: accumulating  
774 Dobzhansky-Muller incompatibilities. *Evolution* **55**, 1085–1094.

- 775 Phadnis, N. (2011) Genetic architecture of male sterility and segregation distortion in  
776 *Drosophila pseudoobscura* Bogotá–USA hybrids. *Genetics* **189**, 1001–1009.
- 777 Pimentel, H., Bray, N.L., Puente, S., Melsted, P. & Pachter, L. (2017) Differential analysis  
778 of RNA-seq incorporating quantification uncertainty. *Nature Methods* **14**, 687.
- 779 Pinharanda, A., Rousselle, M., Martin, S.H., Hanly, J.J., Davey, J.W., Kumar, S., Galtier,  
780 N. & Jiggins, C.D. (2019) Sexually dimorphic gene expression and transcriptome evo-  
781 lution provide mixed evidence for a fast-Z effect in *Heliconius*. *Journal of evolutionary*  
782 *biology* **32**, 194–204.
- 783 Pinharanda, A.L.P. (2017) *The genomic basis of species barriers in Heliconius butterflies*.  
784 Ph.D. thesis, University of Cambridge, Cambridge, UK.
- 785 Pinheiro, E.M. & Montell, D.J. (2004) Requirement for *Par-6* and *Bazooka* in *Drosophila*  
786 border cell migration. *Development* **131**, 5243–5251.
- 787 Presgraves, D.C. (2002) Patterns of postzygotic isolation in Lepidoptera. *Evolution* **56**,  
788 1168–1183.
- 789 Presgraves, D.C. (2007) Speciation genetics: epistasis, conflict and the origin of species.  
790 *Current Biology* **17**, R125–R127.
- 791 Presgraves, D.C. (2010) Darwin and the origin of interspecific genetic incompatibilities. *The*  
792 *American Naturalist* **176**, S45–S60.
- 793 Presgraves, D.C. (2018) Evaluating genomic signatures of “the large x-effect” during com-  
794 plex speciation. *Molecular ecology* **27**, 3822–3830.
- 795 Presgraves, D.C. & Orr, H.A. (1998) Haldane’s rule in taxa lacking a hemizygous X. *Sci-*  
796 *ence* **282**, 952–954.

- 797 Prowell Pashley, D. (1998) Sex linkage and speciation in Lepidoptera. *Endless Forms*.  
798 *Species and Speciation* (eds. D.J. Howard & S.H. Berlocher), pp. 309–319, Oxford Uni-  
799 versity Press, New York.
- 800 Ramsey, J., Bradshaw Jr, H. & Schemske, D.W. (2003) Components of reproductive isola-  
801 tion between the monkeyflowers *Mimulus lewisii* and *M. cardinalis* (Phrymaceae). *Evolu-*  
802 *tion* **57**, 1520–1534.
- 803 Rastas, P. (2017) Lep-MAP3: robust linkage mapping even for low-coverage whole genome  
804 sequencing data. *Bioinformatics* **33**, 3726–3732.
- 805 Raza, Q., Choi, J.Y., Li, Y., O’Dowd, R.M., Watkins, S.C., Chikina, M., Hong, Y., Clark,  
806 N.L. & Kwiatkowski, A.V. (2019) Evolutionary rate covariation analysis of *E-cadherin*  
807 identifies *Raskol* as a regulator of cell adhesion and actin dynamics in *Drosophila*. *PLoS*  
808 *Genetics* **15**, e1007720.
- 809 Rosser, N., Phillimore, A.B., Huertas, B., Willmott, K.R. & Mallet, J. (2012) Testing his-  
810 torical explanations for gradients in species richness in heliconiine butterflies of tropical  
811 america. *Biological journal of the linnean society* **105**, 479–497.
- 812 Rosser, N., Queste, L.M., Cama, B., Edelman, N.B., Mann, F., Mori Pezo, R., Morris, J.,  
813 Segami, C., Velado, P., Schulz, S. *et al.* (2019) Geographic contrasts between pre- and  
814 postzygotic barriers are consistent with reinforcement in *Heliconius* butterflies. *Evolution*  
815 **73**, 1821–1838.
- 816 Sackton, T.B., Corbett-Detig, R.B., Nagaraju, J., Vaishna, L., Arunkumar, K.P. & Hartl,  
817 D.L. (2014) Positive selection drives faster-Z evolution in silkmths. *Evolution* **68**, 2331–  
818 2342.
- 819 Salazar, C.A., Jiggins, C.D., Arias, C., Tobler, A., Bermingham, E. & Linares, M. (2005)  
820 Hybrid incompatibility is consistent with a hybrid origin of *Heliconius heurippa* Hewit-

- 821 son from its close relatives, *Heliconius cydno* Doubleday and *Heliconius melpomene* Lin-  
822 naeus. *Journal of Evolutionary Biology* **18**, 247–256.
- 823 Sánchez, A.P., Pardo-Díaz, C., Enciso-Romero, J., Muñoz, A., Jiggins, C.D., Salazar, C.  
824 & Linares, M. (2015) An introgressed wing pattern acts as a mating cue. *Evolution* **69**,  
825 1619–1629.
- 826 Schaefer, R.E., Kidwell, M.G. & Fausto-Sterling, A. (1979) Hybrid dysgenesis in *Drosophila*  
827 *melanogaster*: morphological and cytological studies of ovarian dysgenesis. *Genetics* **92**,  
828 1141–1152.
- 829 Schartl, M. (2008) Evolution of *Xmrk*: an oncogene, but also a speciation gene? *Bioessays*  
830 **30**, 822–832.
- 831 Schilthuizen, M., Giesbers, M. & Beukeboom, L. (2011) Haldane’s rule in the 21st century.  
832 *Heredity* **107**, 95–102.
- 833 Schumer, M., Cui, R., Powell, D.L., Dresner, R., Rosenthal, G.G. & Andolfatto, P. (2014)  
834 High-resolution mapping reveals hundreds of genetic incompatibilities in hybridizing fish  
835 species. *Elife* **3**, e02535.
- 836 Seixas, F.A., Edelman, N.B. & Mallet, J. (2021) Synteny-based genome assembly for 16  
837 species of *Heliconius* butterflies, and an assessment of structural variation across the  
838 genus. *Genome Biology and Evolution* Evab069.
- 839 Snee, M.J. & Macdonald, P.M. (2009) *Bicaudal C* and *trailer hitch* have similar roles in  
840 *gurken* mRNA localization and cytoskeletal organization. *Developmental Biology* **328**,  
841 434–444.
- 842 Sperling, F.A. (1994) Sex-linked genes and species differences in lepidoptera .
- 843 Sweigart, A.L., Fishman, L. & Willis, J.H. (2006) A simple genetic incompatibility causes  
844 hybrid male sterility in *Mimulus*. *Genetics* **172**, 2465–2479.

- 845 Tang, S. & Presgraves, D.C. (2009) Evolution of the *Drosophila* nuclear pore complex re-  
846 sults in multiple hybrid incompatibilities. *Science* **323**, 779–782.
- 847 Tarasov, A., Vilella, A.J., Cuppen, E., Nijman, I.J. & Prins, P. (2015) Sambamba: fast pro-  
848 cessing of NGS alignment formats. *Bioinformatics* **31**, 2032–2034.
- 849 Turelli, M. & Moyle, L.C. (2007) Asymmetric postmating isolation: Darwin’s corollary to  
850 Haldane’s rule. *Genetics* **176**, 1059–1088.
- 851 Turelli, M. & Orr, H.A. (1995) The dominance theory of Haldane’s Rule. *Genetics* **140**,  
852 389–402.
- 853 Van Belleghem, S.M., Baquero, M., Papa, R., Salazar, C., McMillan, W.O., Counterman,  
854 B.A., Jiggins, C.D. & Martin, S.H. (2018) Patterns of Z chromosome divergence among  
855 *Heliconius* species highlight the importance of historical demography. *Molecular Ecology*  
856 **27**, 3852–3872.
- 857 Wellington, A., Emmons, S., James, B., Calley, J., Grover, M., Tolia, P. & Manseau, L.  
858 (1999) Spire contains actin binding domains and is related to ascidian posterior end  
859 mark-5. *Development* **126**, 5267–5274.
- 860 Wilhelm, J.E., Buszczak, M. & Sayles, S. (2005) Efficient protein trafficking requires *trailer*  
861 *hitch*, a component of a ribonucleoprotein complex localized to the ER in *Drosophila*.  
862 *Developmental Cell* **9**, 675–685.
- 863 Wu, C.I. & Davis, A.W. (1993) Evolution of postmating reproductive isolation: the com-  
864 posite nature of Haldane’s Rule and its genetic bases. *The American Naturalist* **142**,  
865 187–212.
- 866 Yamauchi, H. & Yoshitake, N. (1984) Developmental stages of ovarian follicles of the silk-  
867 worm, *Bombyx mori* L. *Journal of Morphology* **179**, 21–31.

868

## Supplementary information

869

### Linkage Map

870

For the reads aligned to Hpar, the linkage map comprised 159,952 markers (a 29% improvement on Hmel2.5, with a total map length of 1157.27 cM). Marey maps plotting physical distances against genetic distance showed that linkage maps created using Hmel2.5 aligned reads and Hpar aligned reads were broadly similar (Supplementary Figs. S4 and S5). However, with Hpar some additional large regions with low recombination were apparent (for example, on the distal end of chromosome 15). Plots of estimated recombination rates between all pairs of markers for both linkage maps showed no evidence of misplaced markers (Supplementary Fig. S6). To validate our genotypic data and linkage map, we performed a QTL analysis on a wing colour pattern trait (presence / absence of yellow apical dots on the forewing). As expected, this showed a significant QTL peak encompassing the gene *cortex* (Supplementary Fig. S7), which is known to be involved in yellow colour pattern elements in *Heliconius* (Nadeau et al. (2016) The gene *cortex* controls mimicry and crypsis in butterflies and moths. Nature 534, 106–110).

882

| Chromosome | Hpar      |         | Hmel2.5   |         |
|------------|-----------|---------|-----------|---------|
|            | n markers | cM      | n markers | cM      |
| 1          | 11627     | 54.84   | 9353      | 53.57   |
| 2          | 4923      | 55.98   | 3537      | 55.98   |
| 3          | 5558      | 49.52   | 4342      | 46.57   |
| 4          | 4153      | 50.2    | 3038      | 49.04   |
| 5          | 5698      | 60.46   | 4618      | 57.29   |
| 6          | 8715      | 51.22   | 6853      | 50.03   |
| 7          | 8383      | 48.84   | 6914      | 48.84   |
| 8          | 5820      | 59.53   | 4549      | 53.66   |
| 9          | 5395      | 62.06   | 4193      | 50.32   |
| 10         | 11760     | 55.84   | 8840      | 55.87   |
| 11         | 6682      | 51.8    | 5333      | 50.44   |
| 12         | 9825      | 57.4    | 7818      | 55.93   |
| 13         | 10806     | 49.1    | 8278      | 48.95   |
| 14         | 4570      | 54.94   | 3452      | 54.96   |
| 15         | 6474      | 44.27   | 4919      | 45.46   |
| 16         | 6037      | 88.75   | 5041      | 69.48   |
| 17         | 10856     | 57.01   | 8272      | 57.04   |
| 18         | 9377      | 57.04   | 7427      | 53.81   |
| 19         | 10134     | 53.57   | 7847      | 53.63   |
| 20         | 8637      | 37.64   | 6616      | 38.68   |
| Z          | 4527      | 57.29   | 3216      | 57.4    |
| TOTALS     | 159957    | 1157.27 | 124456    | 1106.95 |

**Table S1: Numbers of markers on each chromosome and chromosome length in centimorgans for linkage maps using reads aligned to Hpar (left) and Hmel2.5 (right) reference genomes.**



| Specimen | population | tissue | reads ( $\times 10^6$ ) | pct $Q \geq 30$ | mapped ( $\times 10^6$ ) | pct mapped |
|----------|------------|--------|-------------------------|-----------------|--------------------------|------------|
| NR15-459 | backcross  | EGG    | 53.74                   | 94.35           | 33.70                    | 63         |
| NR15-459 | backcross  | TIP    | 55.64                   | 94.64           | 38.68                    | 70         |
| NR15-459 | backcross  | VIT    | 50.93                   | 95.04           | 35.50                    | 70         |
| NR15-461 | backcross  | EGG    | 42.73                   | 94.86           | 29.07                    | 68         |
| NR15-461 | backcross  | TIP    | 47.19                   | 94.90           | 33.06                    | 70         |
| NR15-461 | backcross  | VIT    | 52.75                   | 94.46           | 34.29                    | 65         |
| NR15-465 | backcross  | TIP    | 44.82                   | 95.16           | 31.15                    | 69         |
| NR15-465 | backcross  | VIT    | 39.70                   | 93.90           | 25.80                    | 65         |
| NR15-474 | backcross  | EGG    | 48.49                   | 94.86           | 34.02                    | 70         |
| NR15-474 | backcross  | TIP    | 39.77                   | 95.45           | 28.54                    | 72         |
| NR15-474 | backcross  | VIT    | 49.50                   | 94.64           | 34.89                    | 70         |
| NR15-475 | backcross  | TIP    | 53.07                   | 94.84           | 37.04                    | 70         |
| NR15-475 | backcross  | VIT    | 47.44                   | 94.82           | 32.28                    | 68         |
| NR15-483 | backcross  | TIP    | 46.67                   | 94.80           | 32.21                    | 69         |
| NR15-483 | backcross  | VIT    | 42.97                   | 94.50           | 29.09                    | 68         |
| NR15-473 | butleri    | EGG    | 46.92                   | 94.64           | 32.00                    | 68         |
| NR15-473 | butleri    | TIP    | 48.52                   | 94.58           | 32.32                    | 67         |
| NR15-473 | butleri    | VIT    | 50.60                   | 95.11           | 34.67                    | 69         |
| NR15-488 | butleri    | EGG    | 57.83                   | 94.57           | 39.05                    | 68         |
| NR15-488 | butleri    | TIP    | 55.19                   | 94.50           | 37.71                    | 68         |
| NR15-488 | butleri    | VIT    | 50.63                   | 94.51           | 35.38                    | 70         |
| NE19-08  | cydno      | EGG    | 50.02                   | 93.24           | 37.20                    | 74         |
| NE19-08  | cydno      | TIP    | 37.13                   | 94.73           | 28.22                    | 76         |
| NE19-08  | cydno      | VIT    | 56.74                   | 95.15           | 42.88                    | 76         |
| NE19-10  | cydno      | EGG    | 47.44                   | 94.55           | 33.28                    | 70         |
| NE19-10  | cydno      | TIP    | 51.48                   | 94.89           | 39.10                    | 76         |
| NE19-10  | cydno      | VIT    | 44.53                   | 94.76           | 32.45                    | 73         |
| NE19-04  | melpomene  | TIP    | 47.09                   | 95.14           | 31.57                    | 67         |
| NE19-04  | melpomene  | VIT    | 65.44                   | 95.42           | 42.63                    | 65         |
| NE19-06  | melpomene  | EGG    | 48.09                   | 95.03           | 32.28                    | 67         |
| NE19-06  | melpomene  | TIP    | 49.99                   | 94.45           | 35.03                    | 70         |
| NE19-06  | melpomene  | VIT    | 45.57                   | 94.91           | 26.82                    | 59         |

**Table S2: RNA sequencing and read mapping statistics to the Hmel2.5 reference.**

| LOD <sub>f</sub> | chr | QTL1<br>marker          | cM    | limits<br>(cM) | limits<br>(physical)  | chr | QTL2<br>marker          | cM    | limits<br>(cM)  | limits<br>(physical) | $\mu_1$          | $\beta_1 q_1$    | $\beta_2 q_2$    | $\beta_3 q_1 q_2$ | R <sup>2</sup> |
|------------------|-----|-------------------------|-------|----------------|-----------------------|-----|-------------------------|-------|-----------------|----------------------|------------------|------------------|------------------|-------------------|----------------|
| 4.21**           | Z   | hpar210001:<br>7007245  | 29.15 | 10.49-<br>35   | 4649965-<br>7821836   |     |                         |       |                 |                      | 1.37±<br>0.09*** | 0.88±<br>0.19*** |                  |                   | 0.2            |
| 6.93*            | 4   | hpar040001:<br>13734678 | 50.2  | 29.21-<br>50.2 | 10014197-<br>13750774 | Z   | hpar210001:<br>7007245  | 29.15 | 12.85-<br>36.13 | 4663108-<br>7827537  | 1.32±<br>0.09*** | -0.6±<br>0.18**  | 0.81±<br>0.18*** | -0.52±<br>0.36    | 0.31           |
| 6.61+            | 12  | hpar120001:<br>7636661  | 27.16 | 18.94-<br>57.4 | 5248779-<br>17866482  | Z   | hpar210001:<br>5687707  | 18.69 | 10-<br>33.81    | 4649939-<br>7712239  | 1.39±<br>0.09*** | 0.44±<br>0.18*   | 0.88±<br>0.18*** | 0.98±<br>0.36**   | 0.3            |
| 7.87**           | 15  | hpar150002:<br>10183589 | 37.29 | 8.17-<br>43.11 | 5304875-<br>13942281  | Z   | hpar210001:<br>5687707  | 18.69 | 12.85-<br>29.15 | 4663108-<br>7059083  | 1.34±<br>0.09*** | 0.29±<br>0.18    | 0.7±<br>0.18***  | 1.47±<br>0.36***  | 0.34           |
| 14.52***         | Z   | hpar210001:<br>3084795  | 4.65  | 2.33-<br>5.81  | 2035613-<br>4420376   | Z   | hpar210001:<br>10667602 | 54.96 | 53.8-<br>56.13  | 8793636-<br>13440534 | 1.4±<br>0.07***  | 0.6±<br>0.15***  | -0.03±<br>0.15   | -2.53±<br>0.3***  | 0.54           |
| 7.79*            | 8   | c8.loc13                | 13    | 11-<br>13      | 485709-<br>1483261    | 20  | hpar200003:<br>6960802  | 13.02 | 6-<br>13.02     | 3402889-<br>6961037  | 1.61±<br>0.08*** | 0.24±<br>0.16    | -0.22±<br>0.16   | 2.68±<br>0.32***  | 0.79           |

**Table S3: Summary of significant single locus (H<sub>1</sub>) and two locus (H<sub>f</sub>) QTL models using reads aligned to Hpar.** The first column gives the LOD value of the full model (H<sub>f</sub>), with the significance estimated by permutation (+P<0.1, \*P<0.05, \*\*P<0.01, \*\*\*P<0.001). The next columns are the chromosome and QTL marker (scaffold and median physical position within the peak). The centimorgan limits are the Bayesian credible intervals, and the physical limits are the nearest typed flanking markers of that interval (all physical limits were on the same scaffold as the QTL peak, except for the chromosome 4 interaction † with Z, which was on scaffold Hmel204003 of Hmel2.5). The final five columns give the parameter estimates and R<sup>2</sup> of the model.  $\beta_1 q_1$  and  $\beta_2 q_2$  are the estimated additive effects for the QTLs, i.e. the difference between the phenotypic averages for the alternative genotypes, and  $\beta_3 q_1 q_2$  is the coefficient for the interaction between the 2 loci. Model coefficients comprise the estimated value, the standard error, and the significance (thresholds as above). The significant interaction between chromosome 8 and 20 was detected using individuals holding a Z<sub>SB</sub> chromosome only.

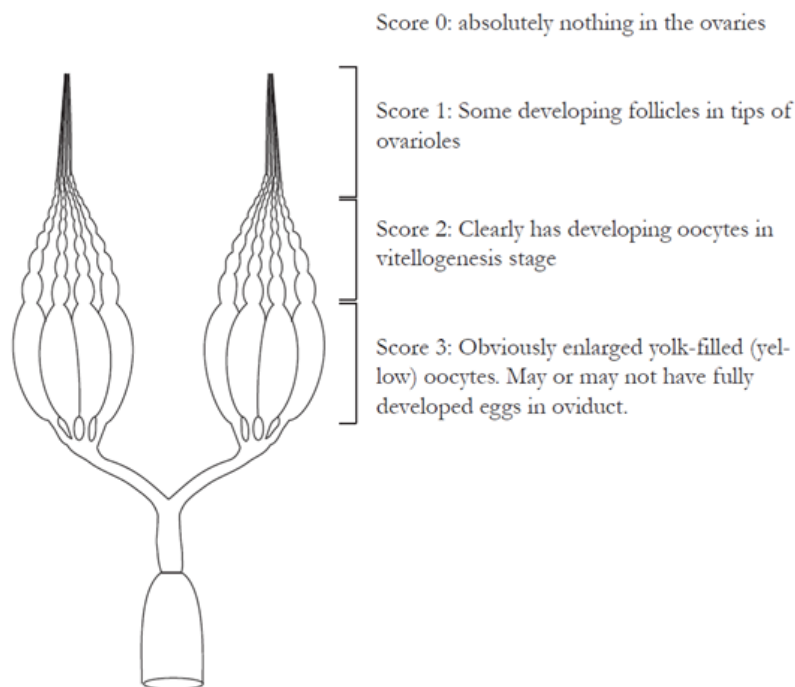

**Figure S1: Fertility score guide.** This scheme was used to characterize hybrid ovarioles in terms of gross developmental phenotype (Gullan & Cranston, 2014).

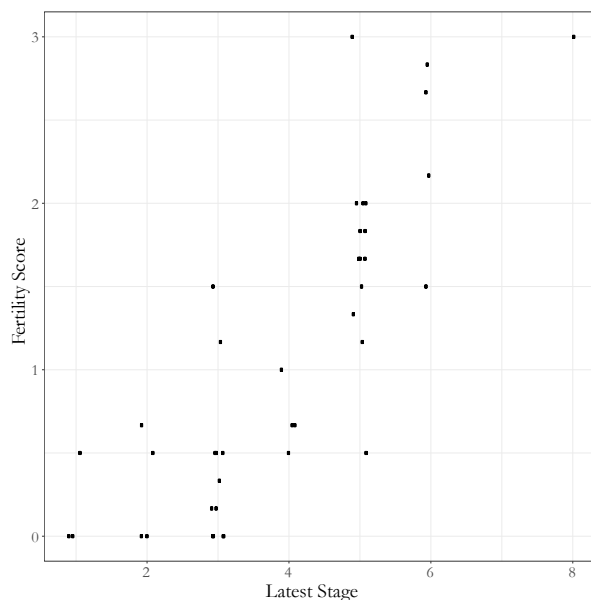

**Figure S2: Comparison of scoring schemes.** Among individuals for whom we were able to score both latest developmental stage and fertility score, the values were highly correlated. Note that the "Latest Stage" measurement is the latest stage observed in the sampled ovariole. Fully-developed eggs (stage 12, (Yamauchi & Yoshitake, 1984)) may have been present in the oviduct but were not observed in ovarioles themselves.

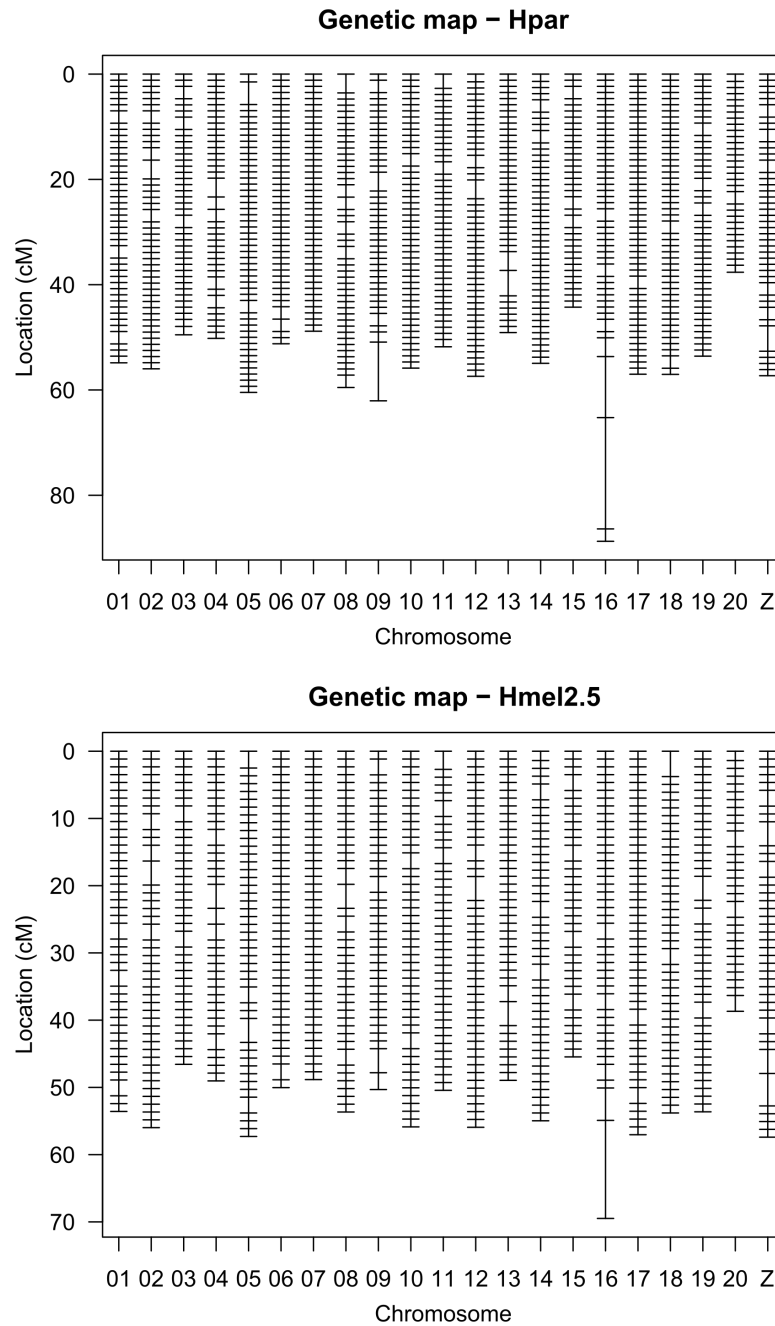

**Figure S3: Marker locations for linkage maps using reads aligned to Hpar and Hmel2.5.**

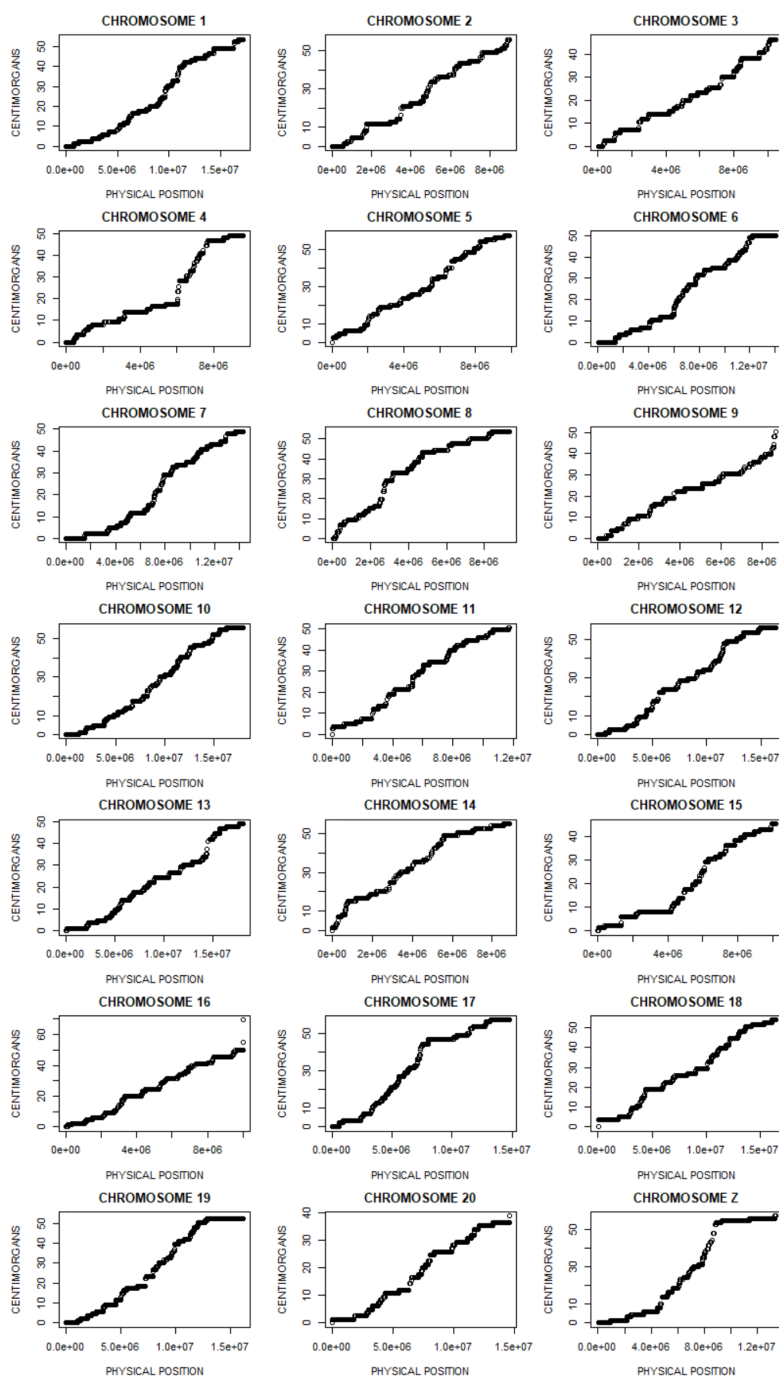

Figure S4: Marey maps using reads aligned to Hmel2.5.

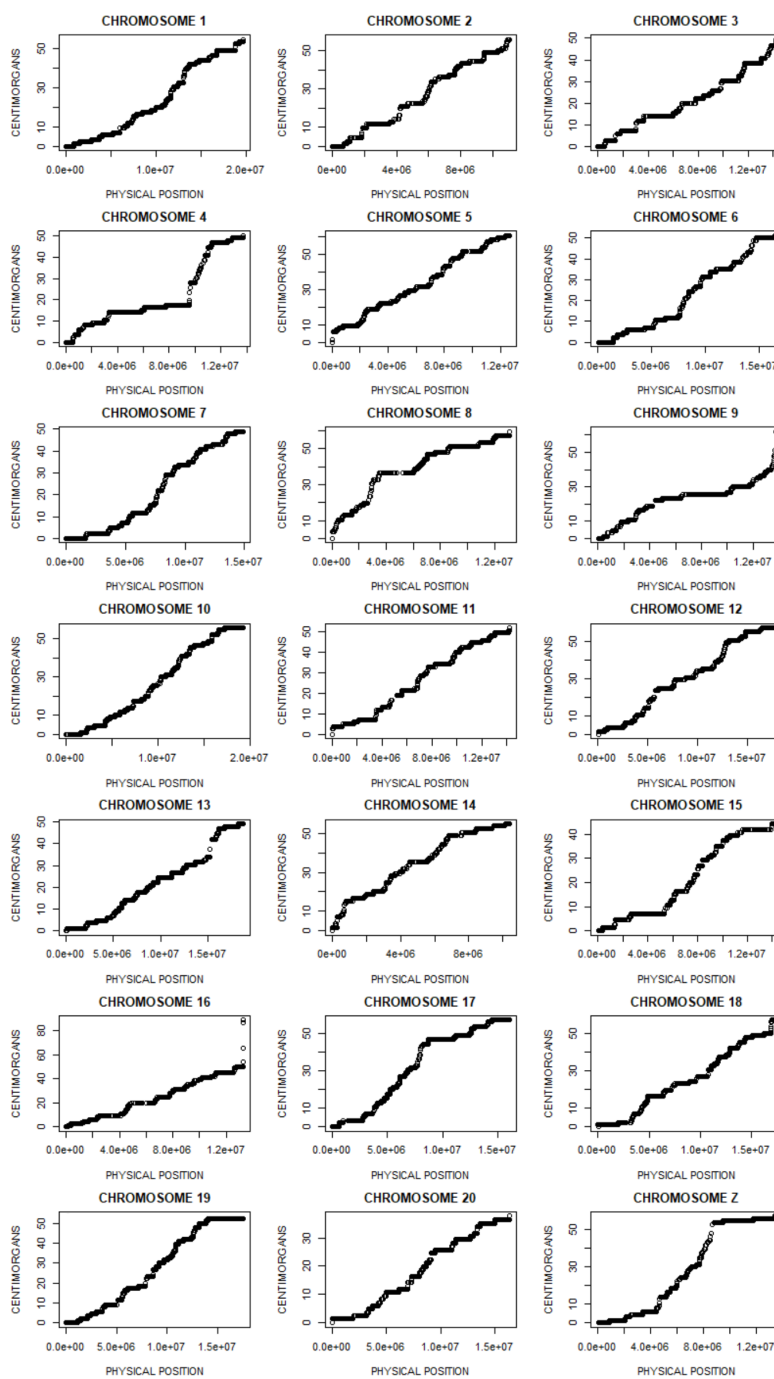

Figure S5: Marey maps using reads aligned to Hpar.

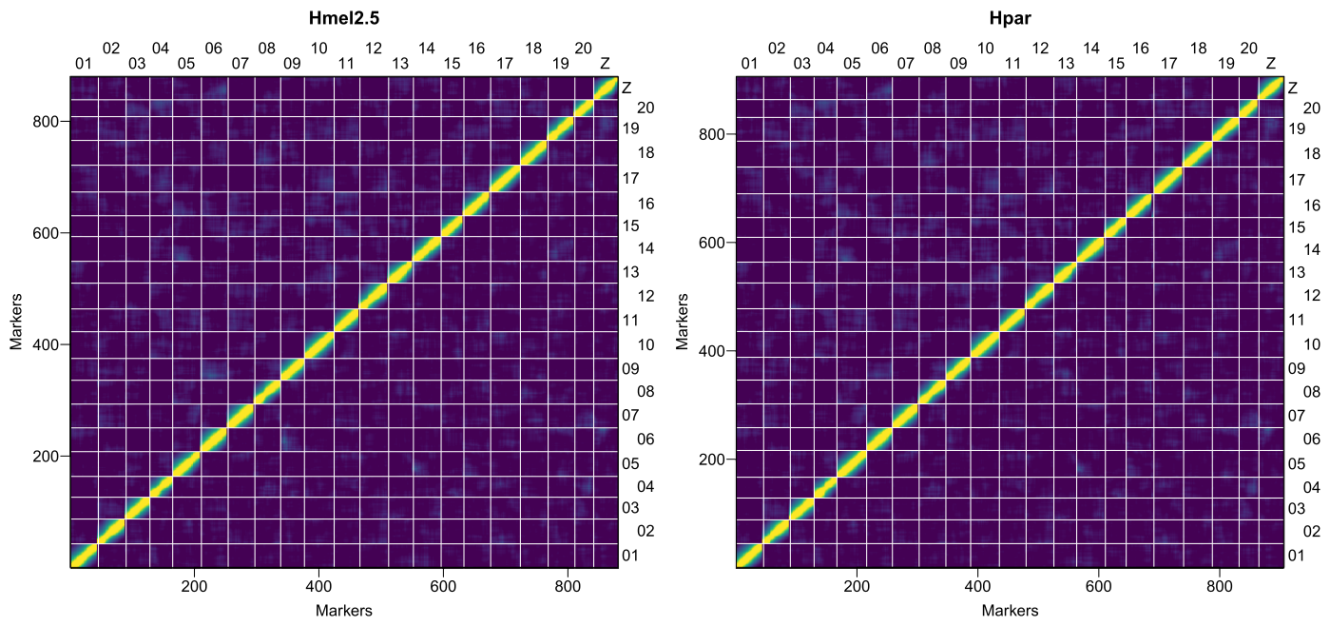

**Figure S6:** Pairwise recombination fractions (upper left) and LOD values for the test of recombination rate = 0.5 (lower right), using the Hmel2.5 and Hpar linkage maps. Yellow indicates linkage, blue indicates no linkage.

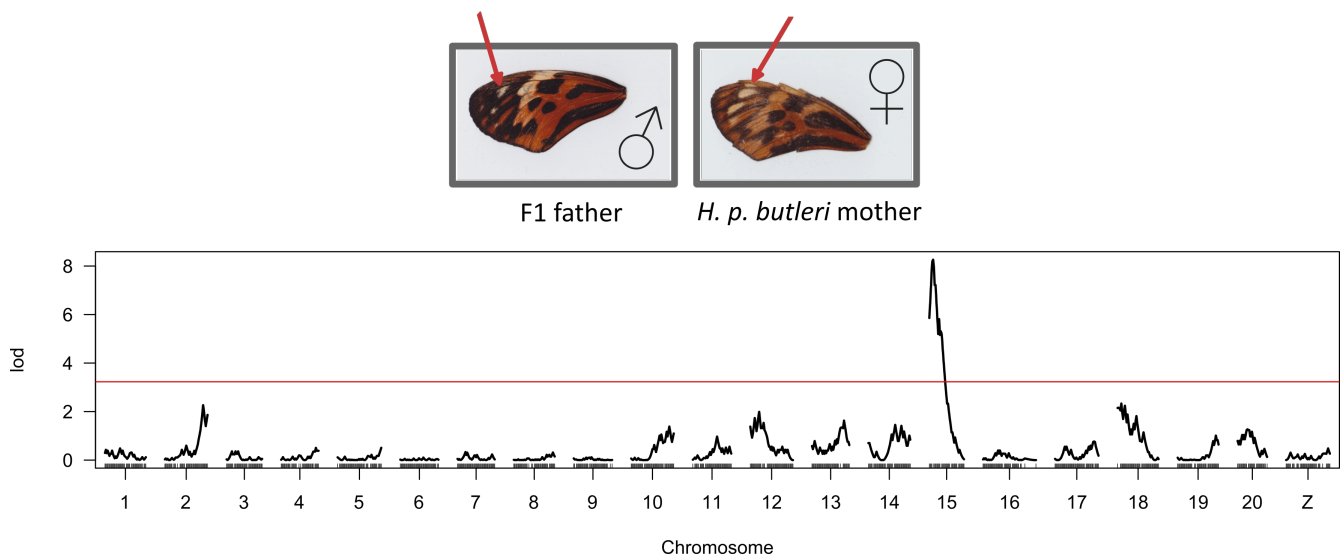

**Figure S7:** Colour pattern QTL. Backcross individuals produced by crossing a male F1 with a *H. p. butleri* female where scored by eye for large/reduced apical dots on the forewing (indicated by the red arrows in the figure). This trait was then analysed using Haley-Knott regression, and showed a significant QTL on chromosome 15, in the region of the gene *cortex*.

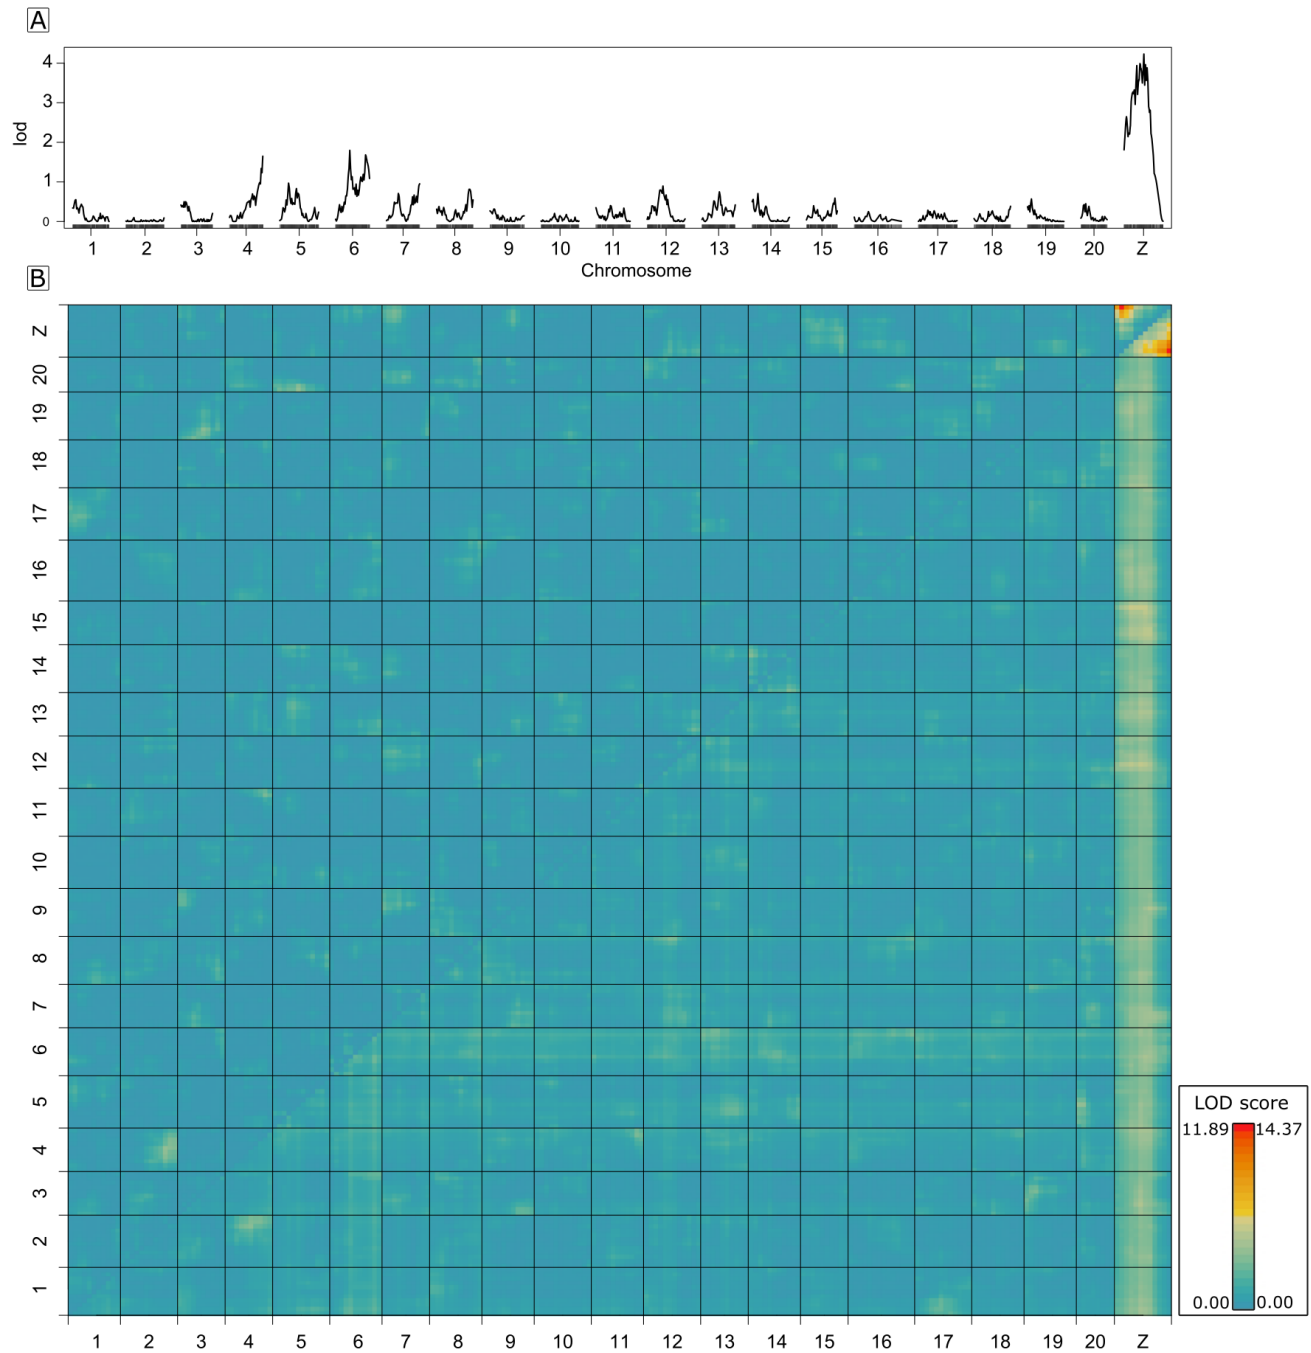

**Figure S8: QTL genome scans controlling for kinship, using reads aligned to Hmel2.5. A.** LOD values for fertility score as a function of genotype. **B.** Heat map for LOD<sub>f</sub> values (upper right triangle) and LOD<sub>int</sub> values (lower left triangle) between pairwise combinations of markers across the genome. Blues indicate low values, reds indicate high values. Max LOD<sub>int</sub> is left of the colour ramp, and max LOD<sub>f</sub> is to the right of the colour ramp.



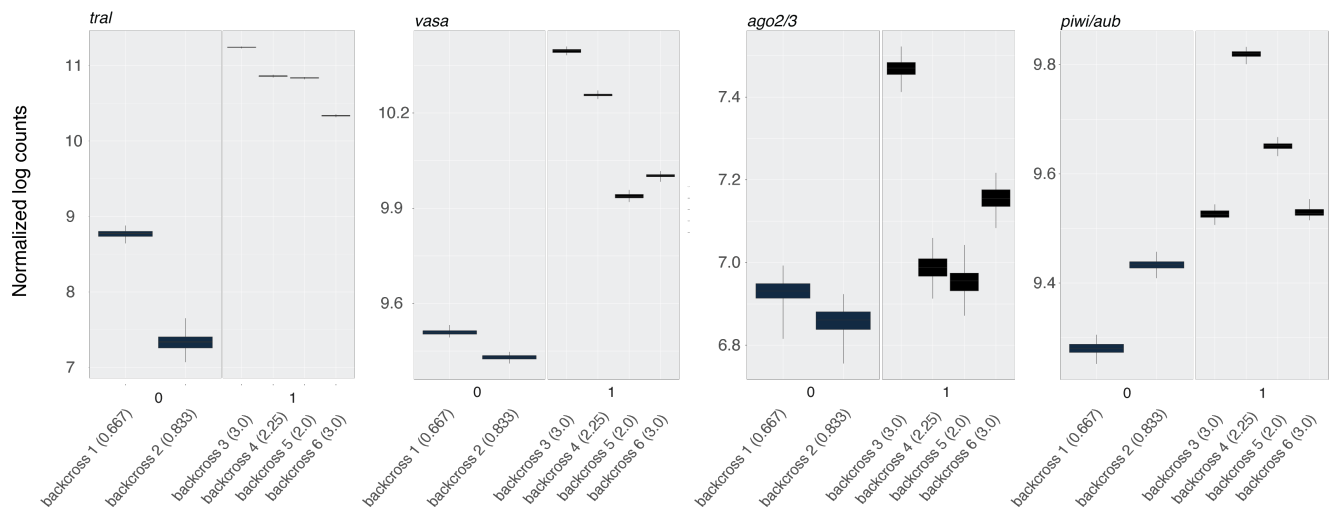

**Figure S9: mRNA expression of piRNA-related transcripts.** Expression levels for *tral*, *vasa*, *AGO2/3*, and *piwi/aubergine* are shown. Individuals are categorized based on whether they contained vitellogenic follicles (1) or not (0). In addition, each individual's fertility score is indicated in parentheses. In each case, abundance is lower in undeveloped ovaries, but only significantly so for *tral* and *vasa*. Width of bars represents the interquartile range of bootstrap-resampled reads for each individual. Lower whisker is the smallest observation greater than or equal to lower edge of bar - 1.5 \* IQR. Upper whisker is the largest observation less than or equal to upper edge of bar + 1.5 \* IQR.
